# Supplementary material for: Genome-wide DNA methylation analysis in blood cells from patients with Werner syndrome
Source: PubMed Central journal article supplement (PMC5577832; doi:10.1186/s13148-017-0389-4), 2017-08-30

# cg17489897 PTEN;KLLN chr10:89621772-89624128 Island

WSvsCTR p-value in GSE42865:0.5851    WSvsCTR p-value in this study:8e-04

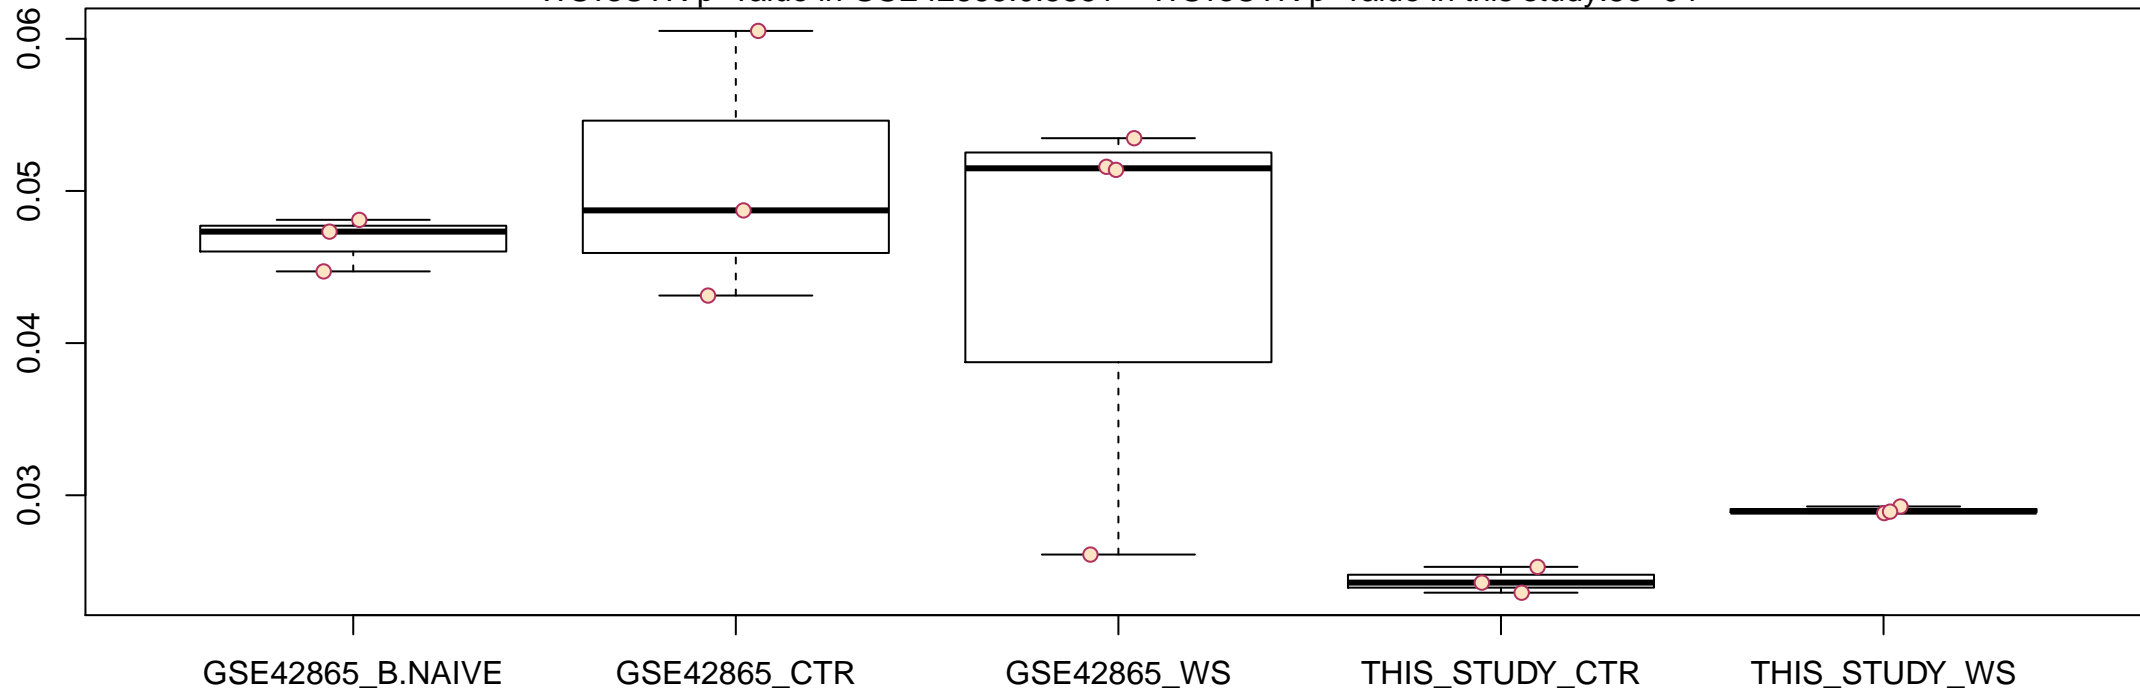

# cg12789488 PPP2R2D

WSvsCTR p-value in GSE42865:0.6328    WSvsCTR p-value in this study:1e-04

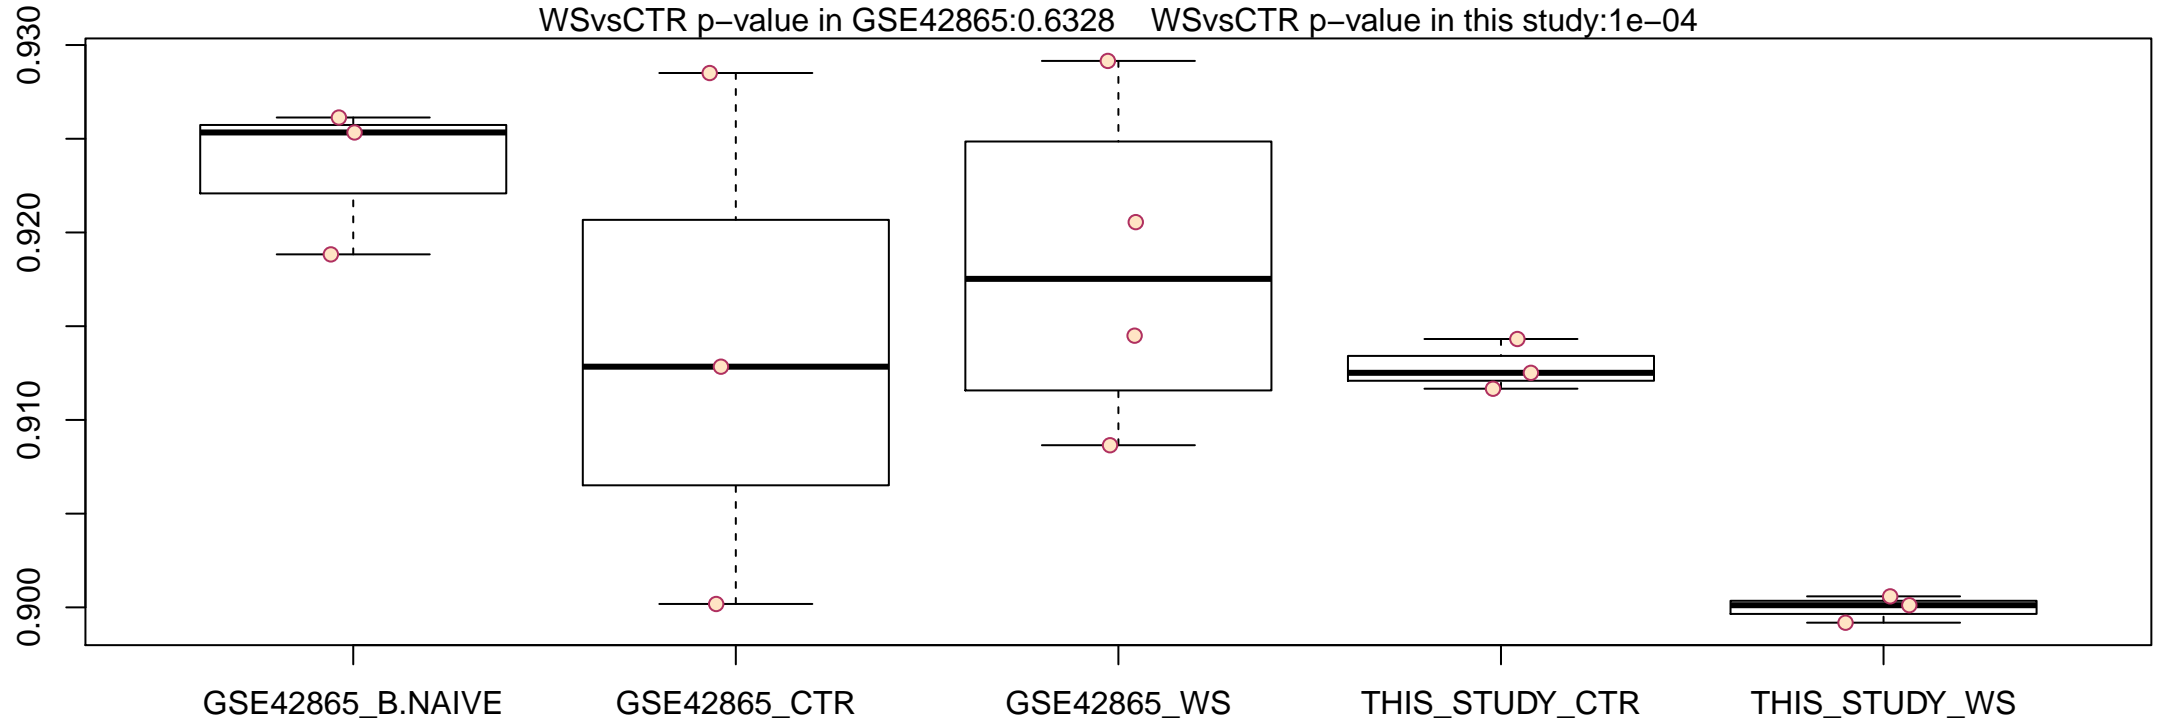

# cg22867714 VWF chr12:6165941-6166257 S\_Shelf

WSvsCTR p-value in GSE42865:0.1719    WSvsCTR p-value in this study:4e-04

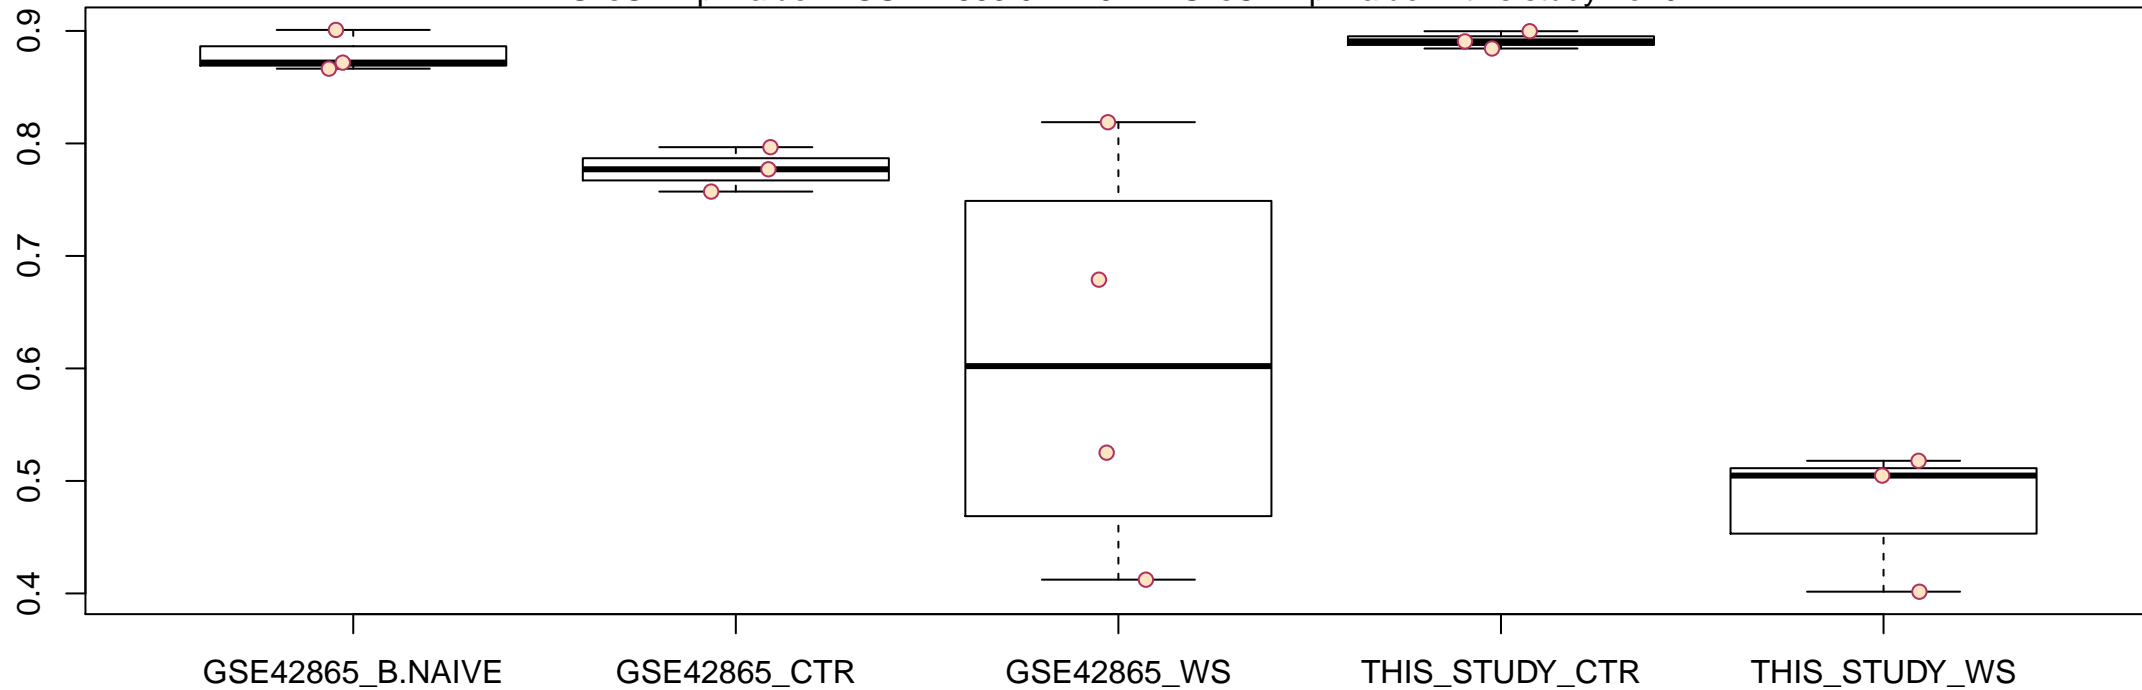



# cg02554391 CDKN1B chr12:12869798–12871248 S\_Shore

WSvsCTR p-value in GSE42865:0.9363 WSvsCTR p-value in this study:9e-04

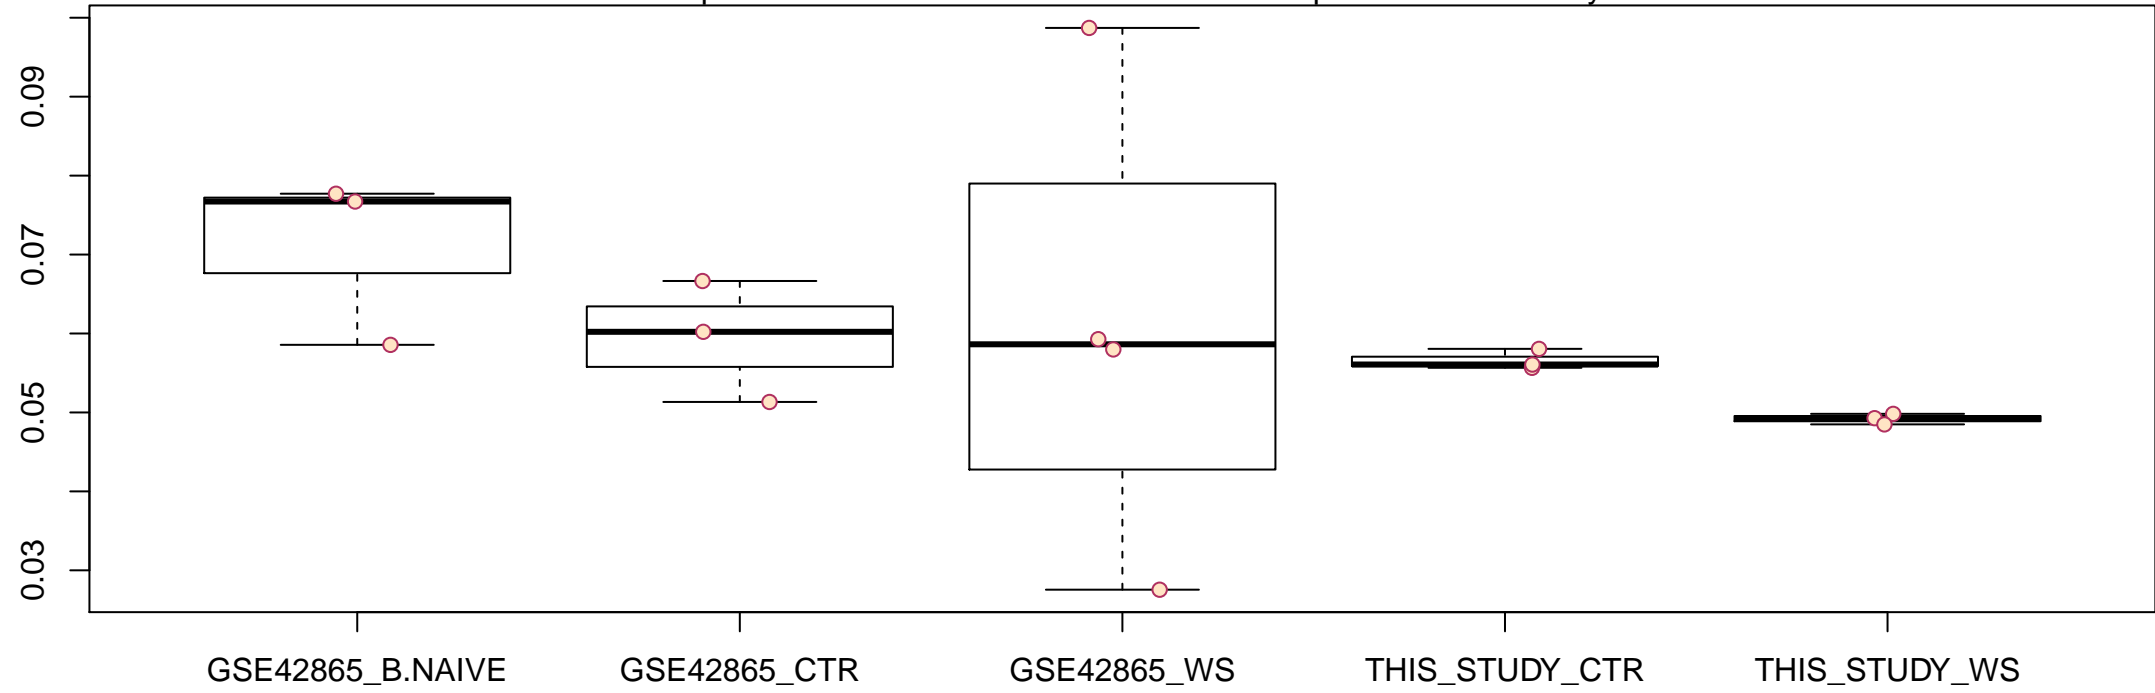

# cg00729708 CERS3 chr15:101084428–101085178 Island

WSvsCTR p-value in GSE42865:0.8121 WSvsCTR p-value in this study:0.0477

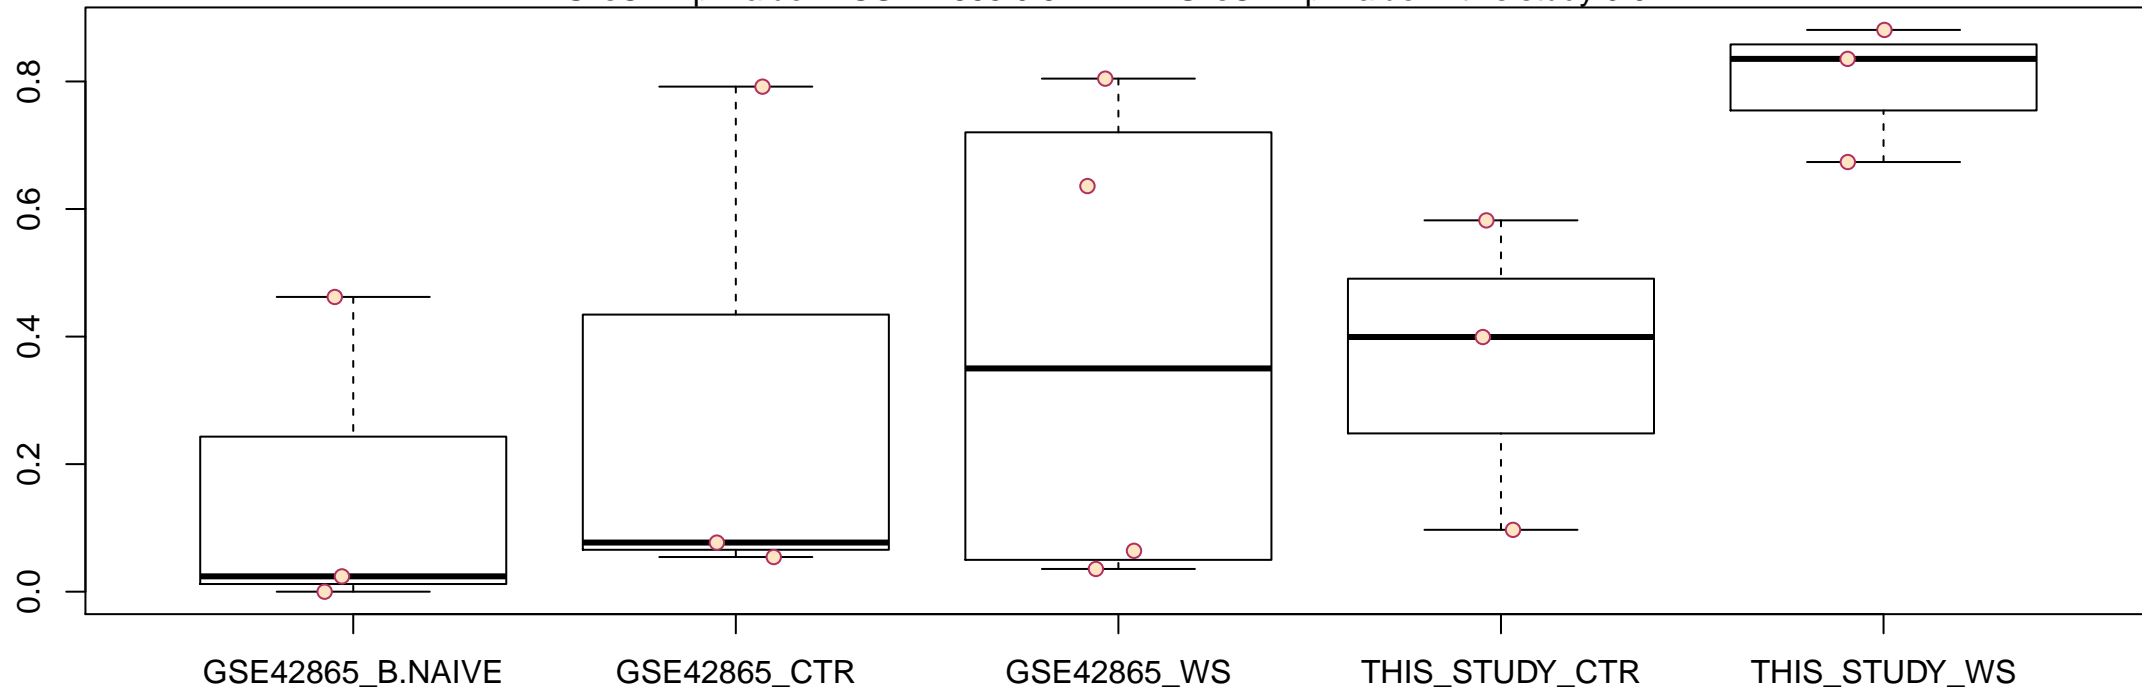

# cg21819984 CERS3 chr15:101084428–101085178 Island

WSvsCTR p-value in GSE42865:0.0532    WSvsCTR p-value in this study:0.0241

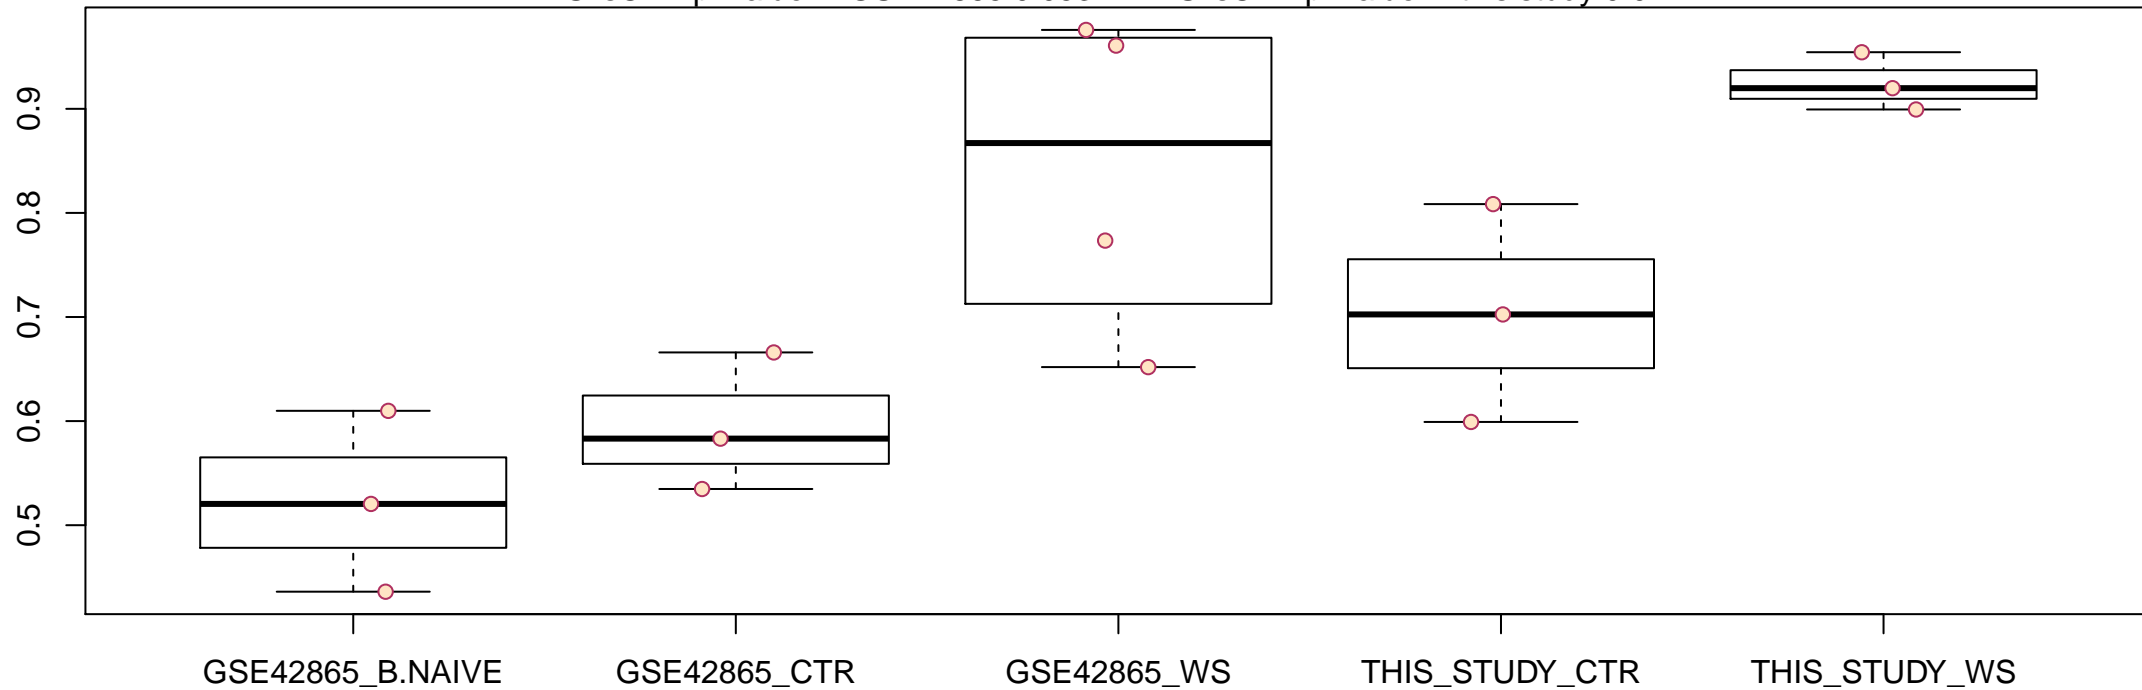

# cg26173375 CERS3 chr15:101084428–101085178 Island

WSvsCTR p-value in GSE42865:0.0096    WSvsCTR p-value in this study:0.0056

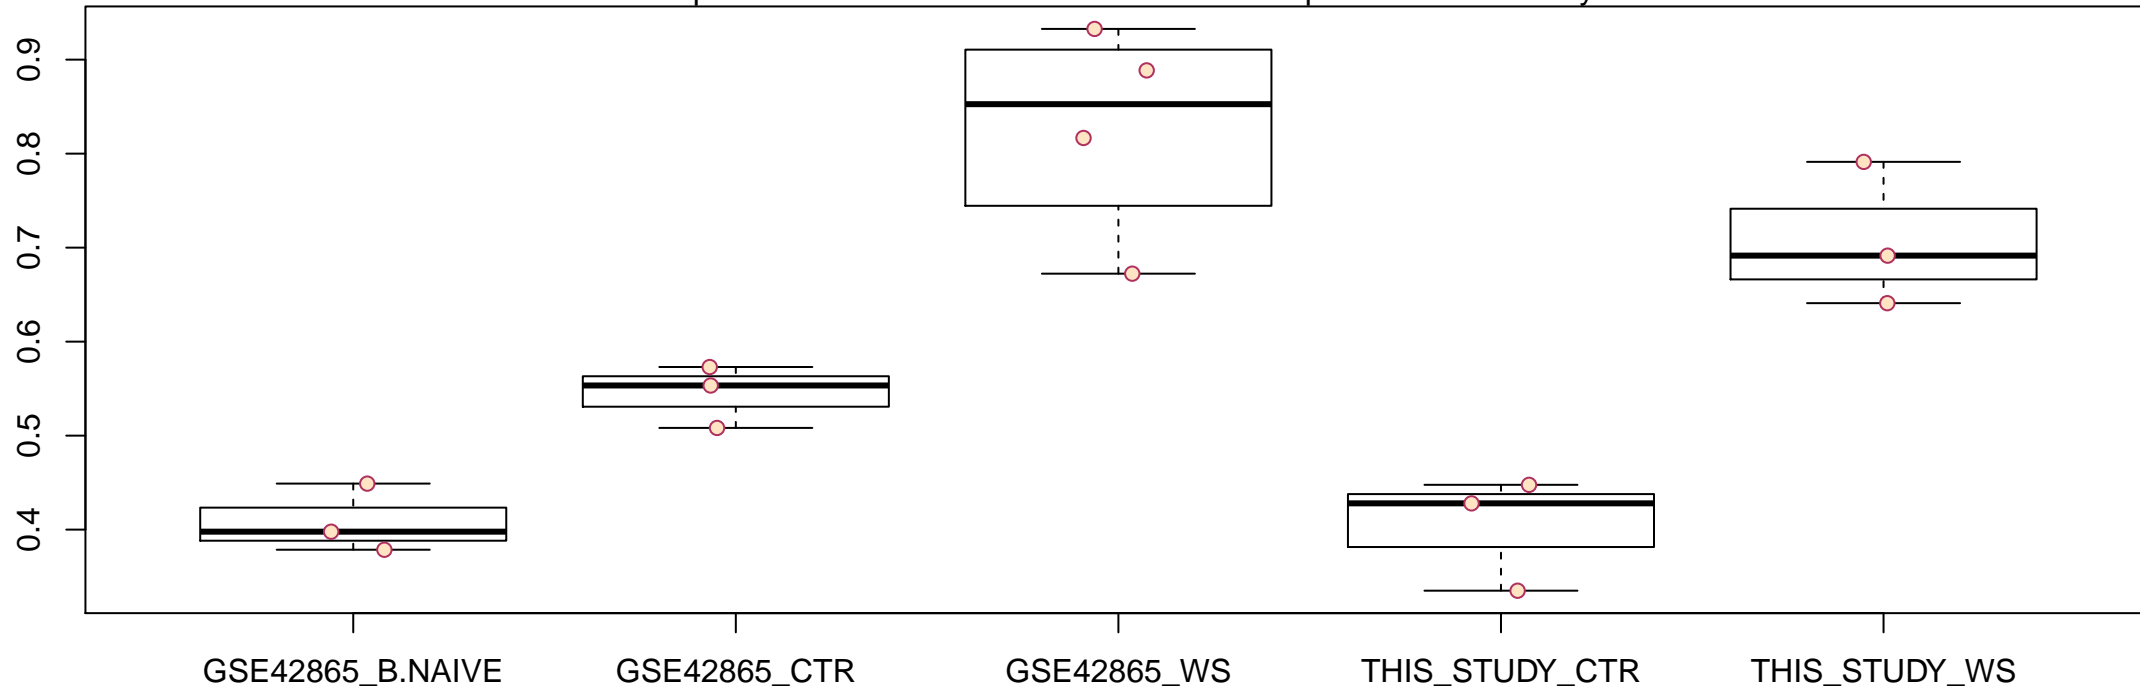



# cg21895387 CERS3 chr15:101084428–101085178 Island

WSvsCTR p-value in GSE42865:0.9927 WSvsCTR p-value in this study:0.0035

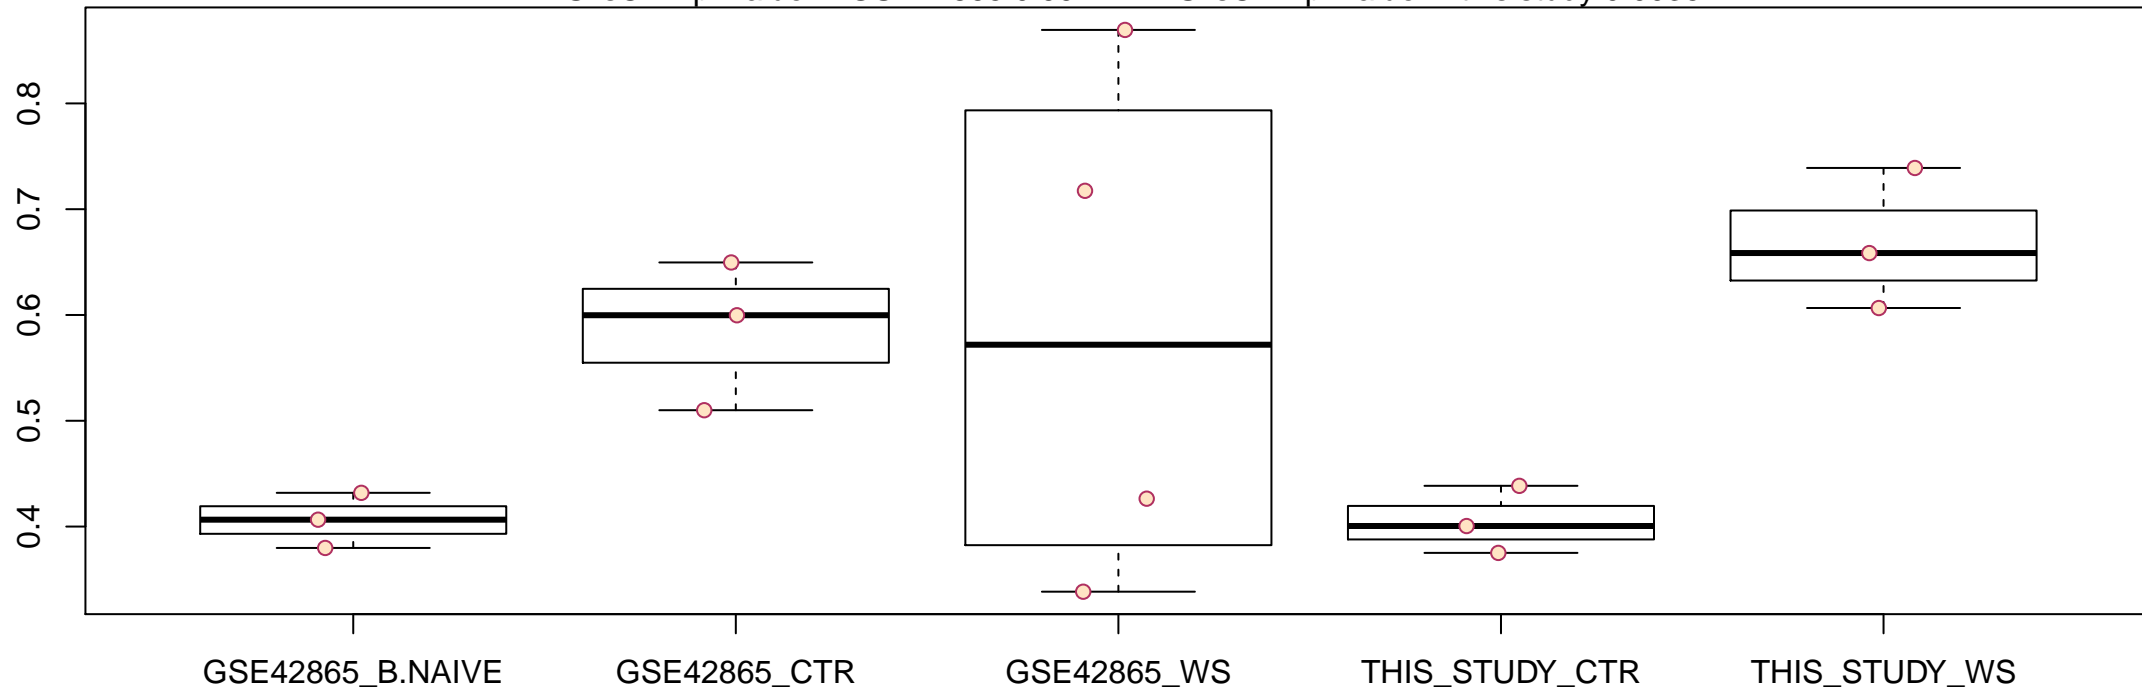

# cg06679270 CERS3 chr15:101084428-101085178 Island

WSvsCTR p-value in GSE42865:0.2237 WSvsCTR p-value in this study:0

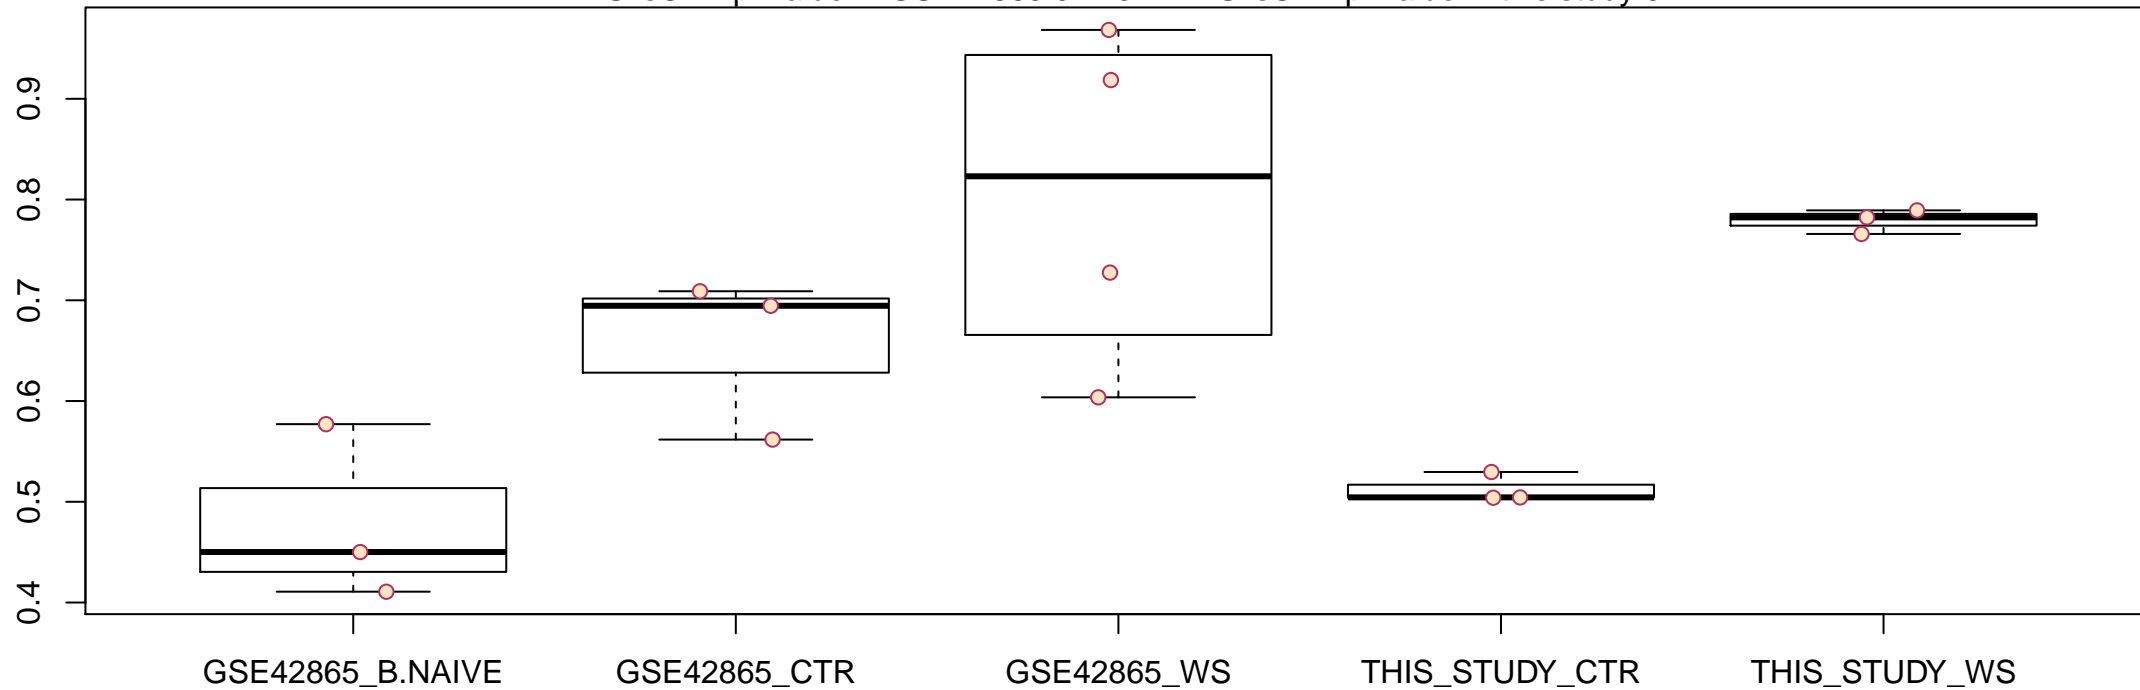

# cg06679270 CERS3 chr15:101084428-101085178 Island

WSvsCTR p-value in GSE42865:0.2237    WSvsCTR p-value in this study:0

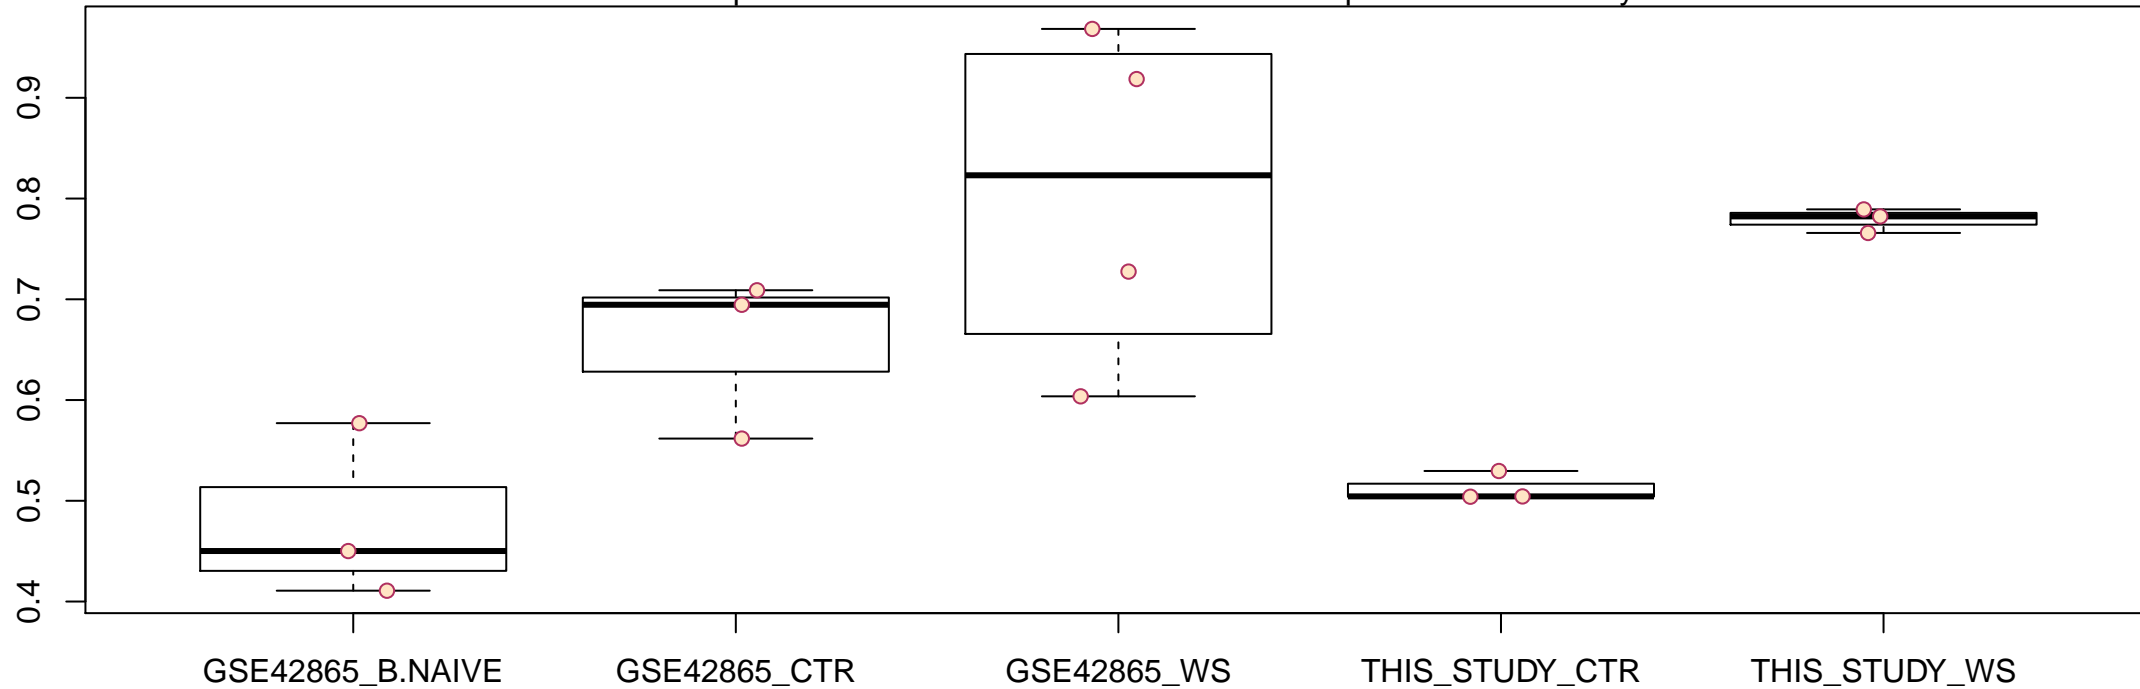

# cg25004981 CERS3 chr15:101084428-101085178 Island

WSvsCTR p-value in GSE42865:0.843 WSvsCTR p-value in this study:0.1595

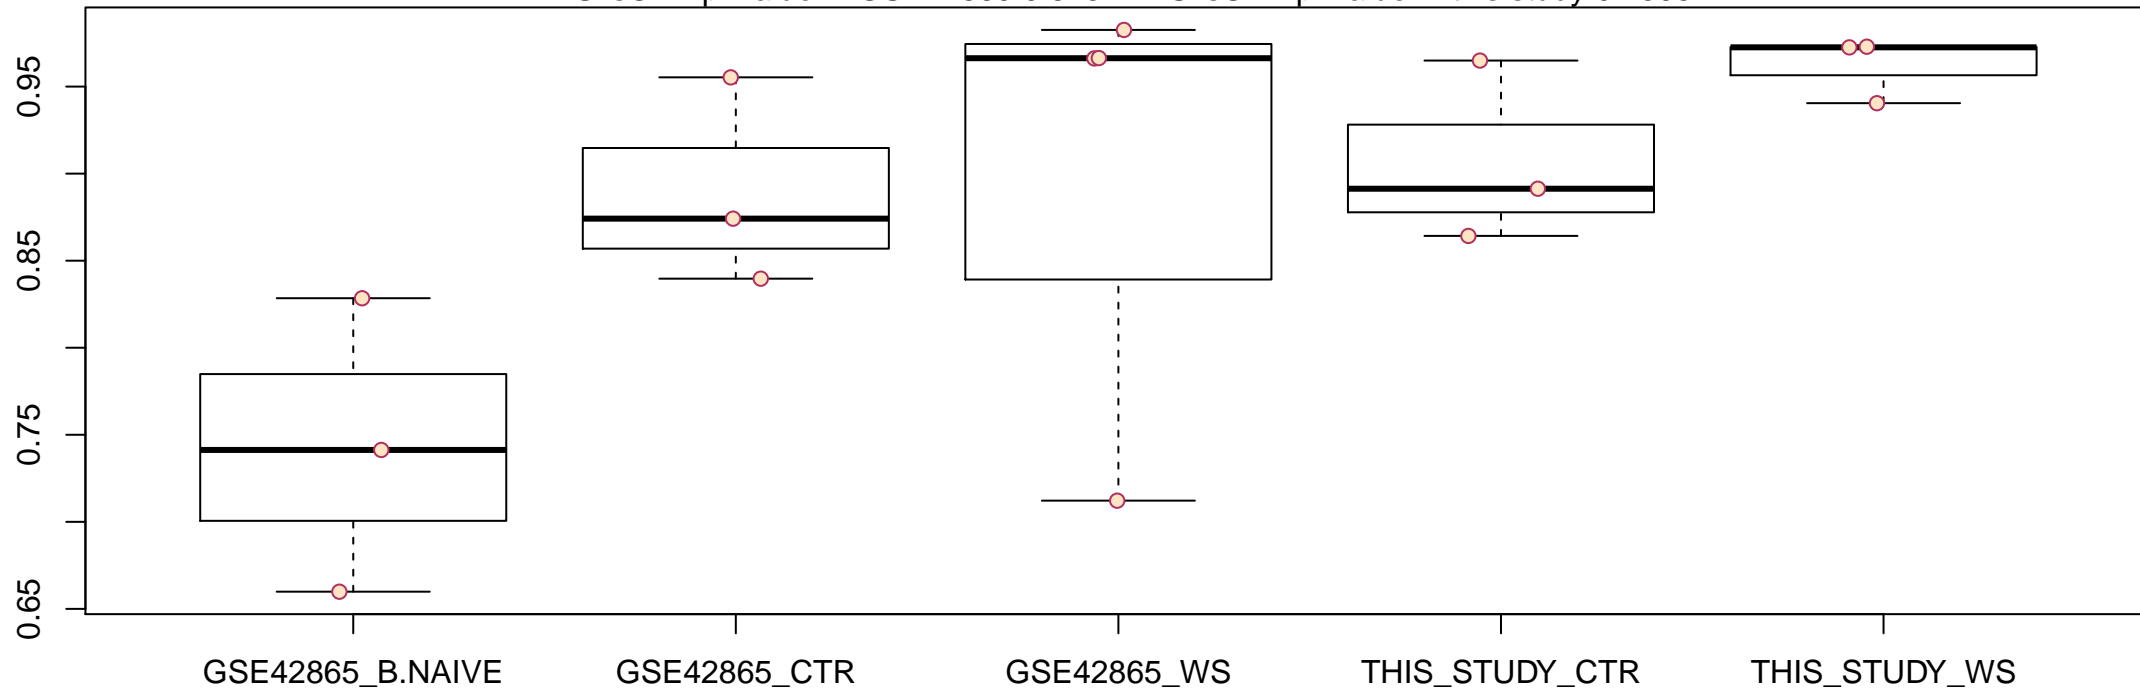

# cg18388910 CERS3 chr15:101084428-101085178 Island

WSvsCTR p-value in GSE42865:0.2579 WSvsCTR p-value in this study:0.0472

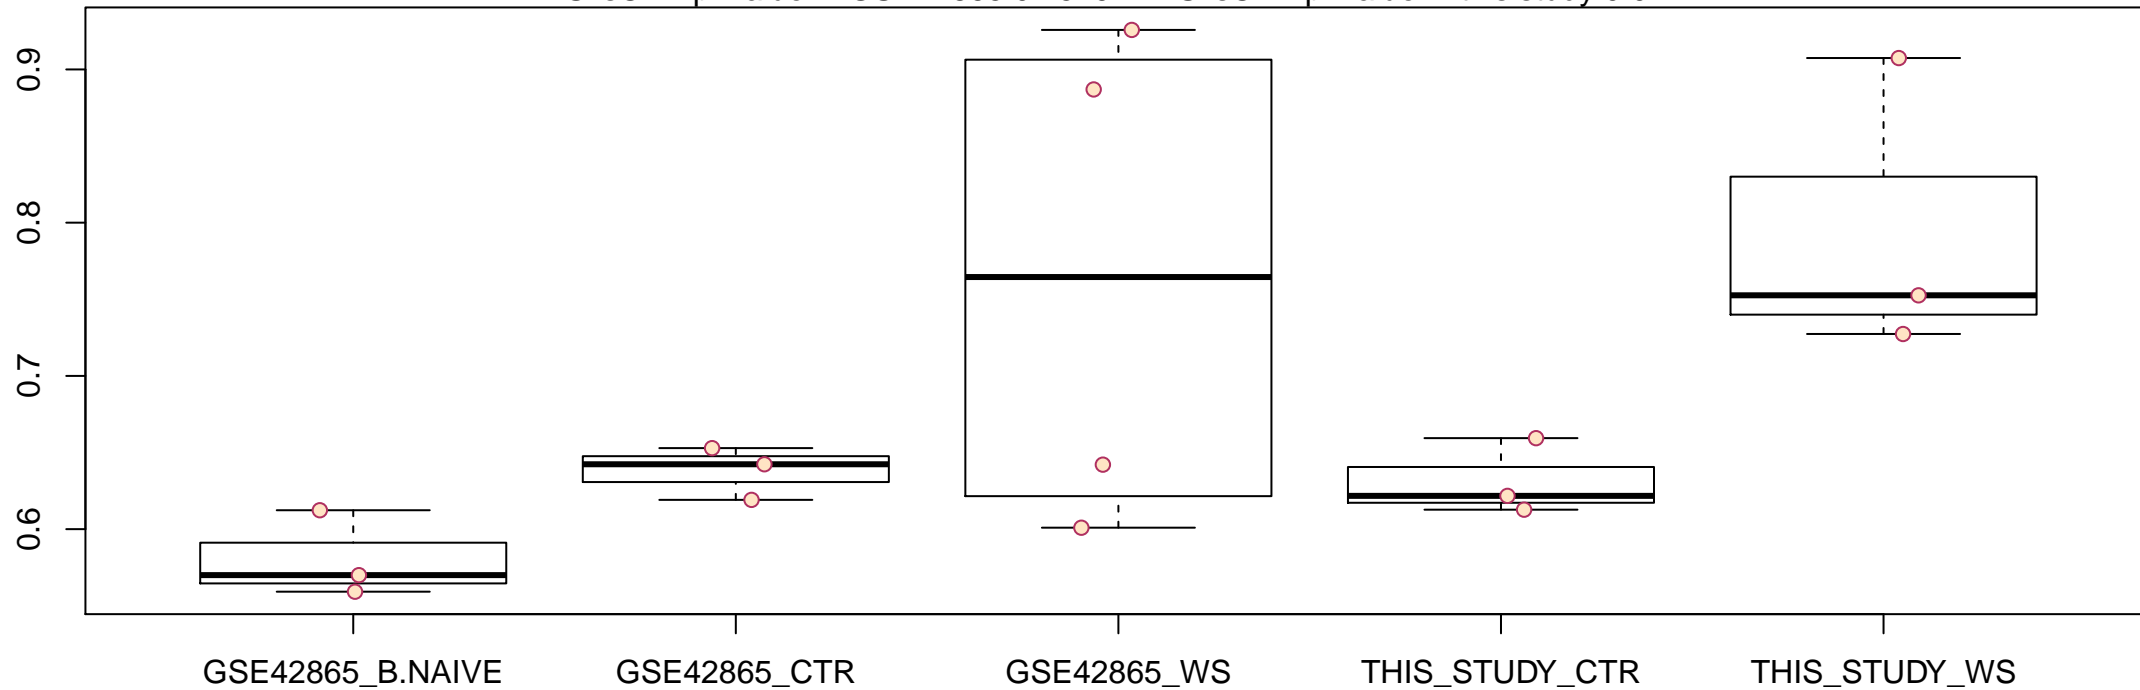

# cg06777813 CERS3 chr15:101084428–101085178 Island

WSvsCTR p-value in GSE42865:0.4953    WSvsCTR p-value in this study:0.1812

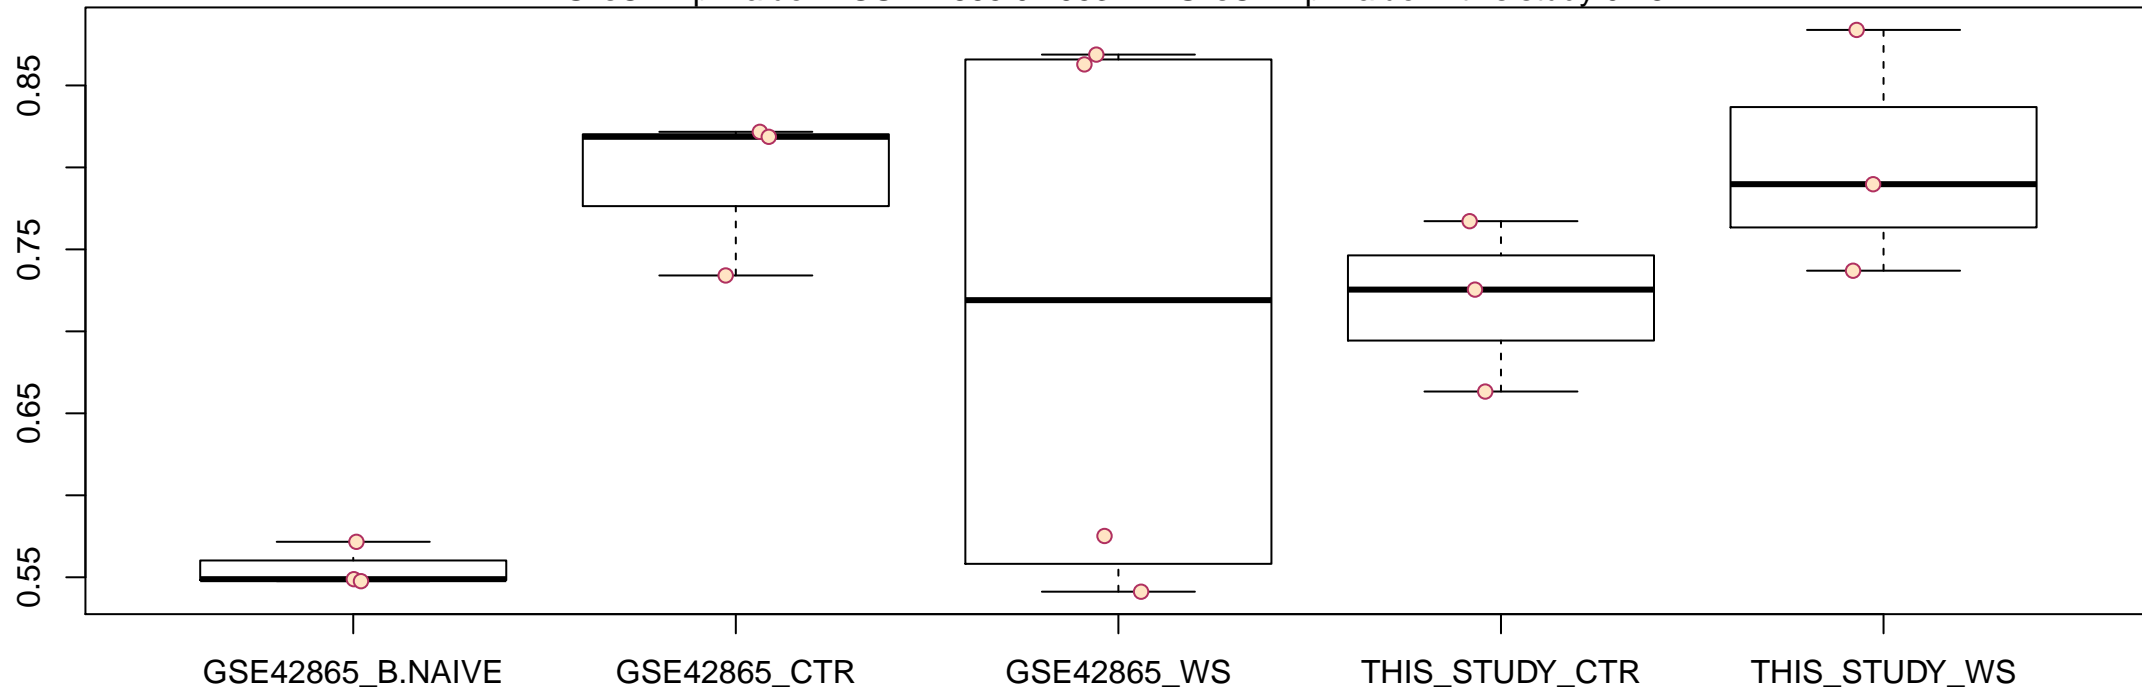



# cg19646165 GABARAP chr17:7141121-7143071 S\_Shore

WSvsCTR p-value in GSE42865:0.7842 WSvsCTR p-value in this study:6e-04

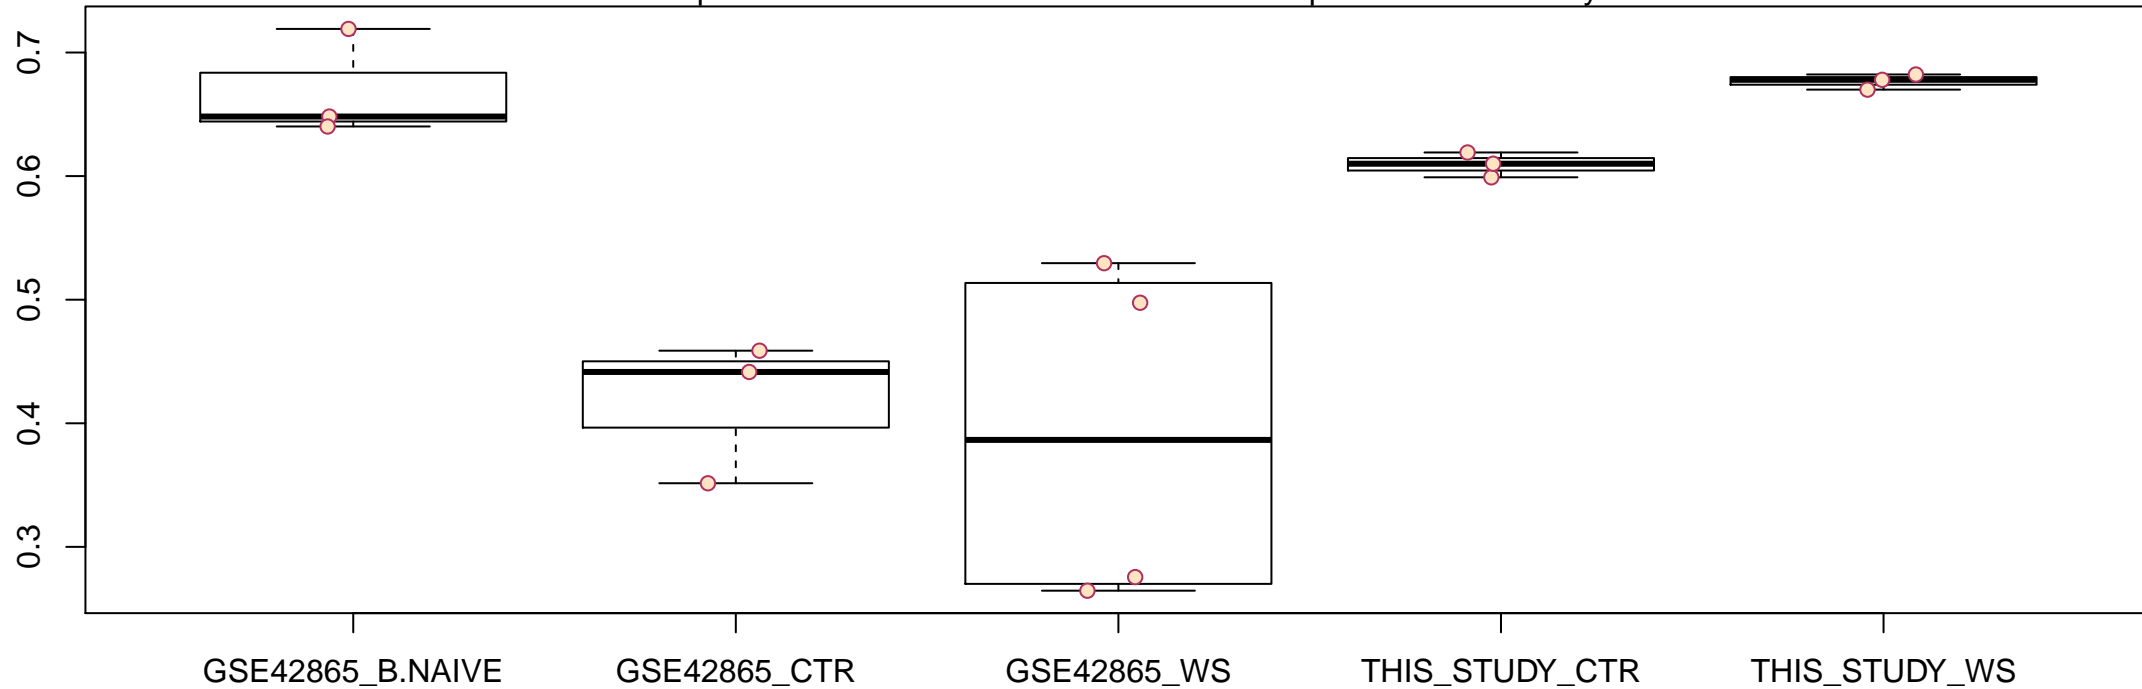



# cg06270615 STAT3

WSvsCTR p-value in GSE42865:0.5659    WSvsCTR p-value in this study:6e-04

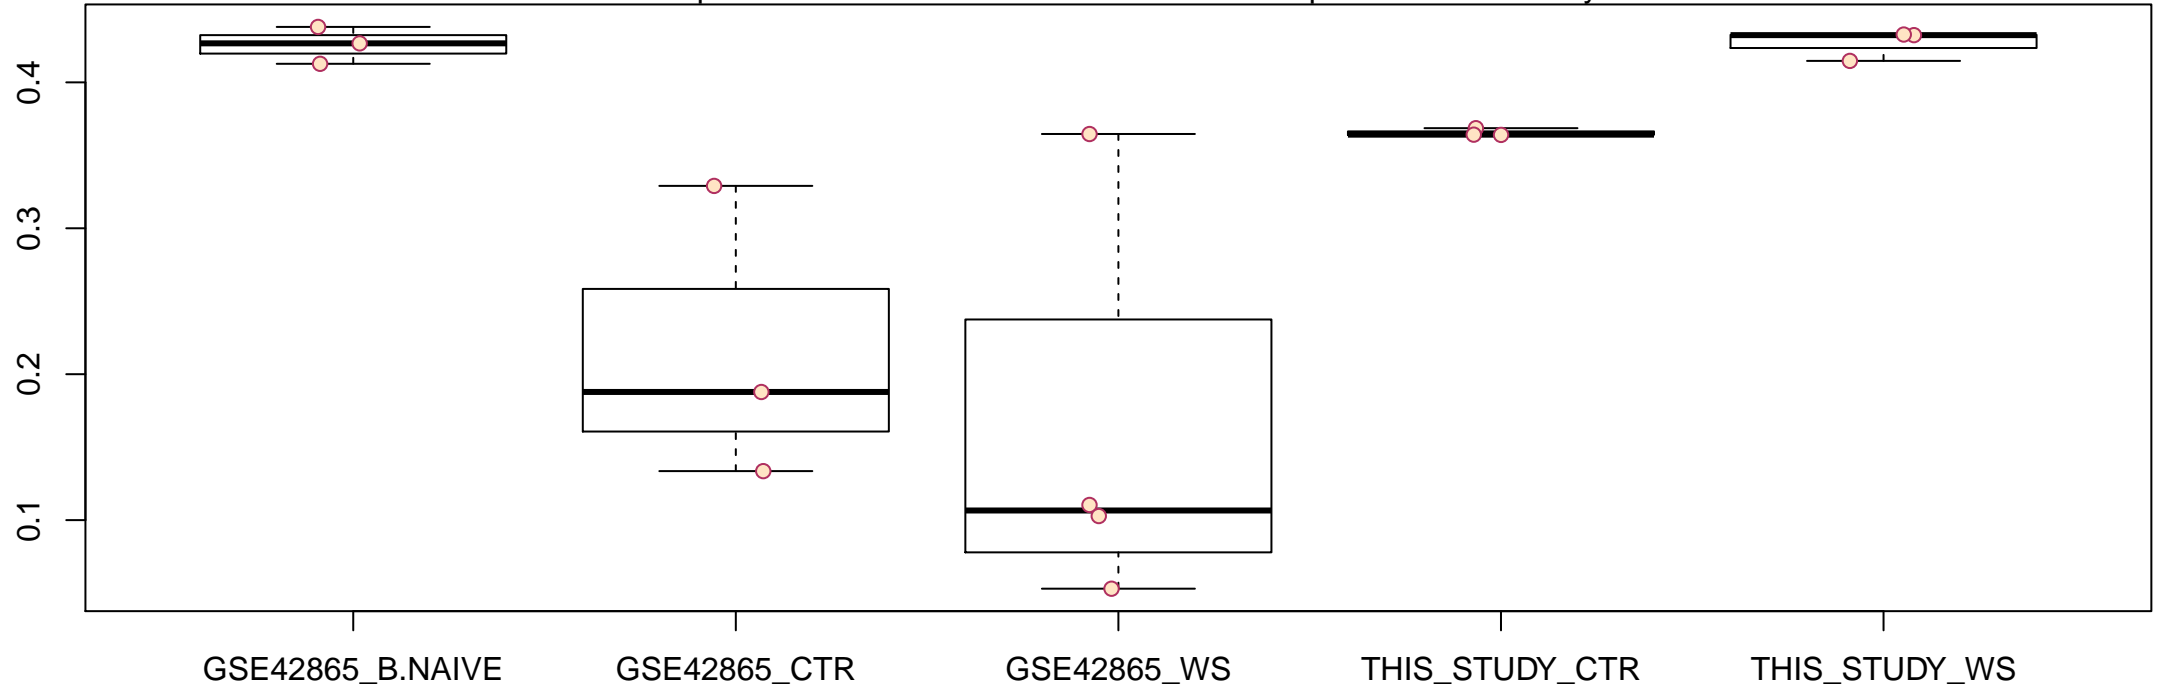

# cg03407524 FASN chr17:80046054–80046330 N\_Shelf

WSvsCTR p-value in GSE42865:0.5692    WSvsCTR p-value in this study:0

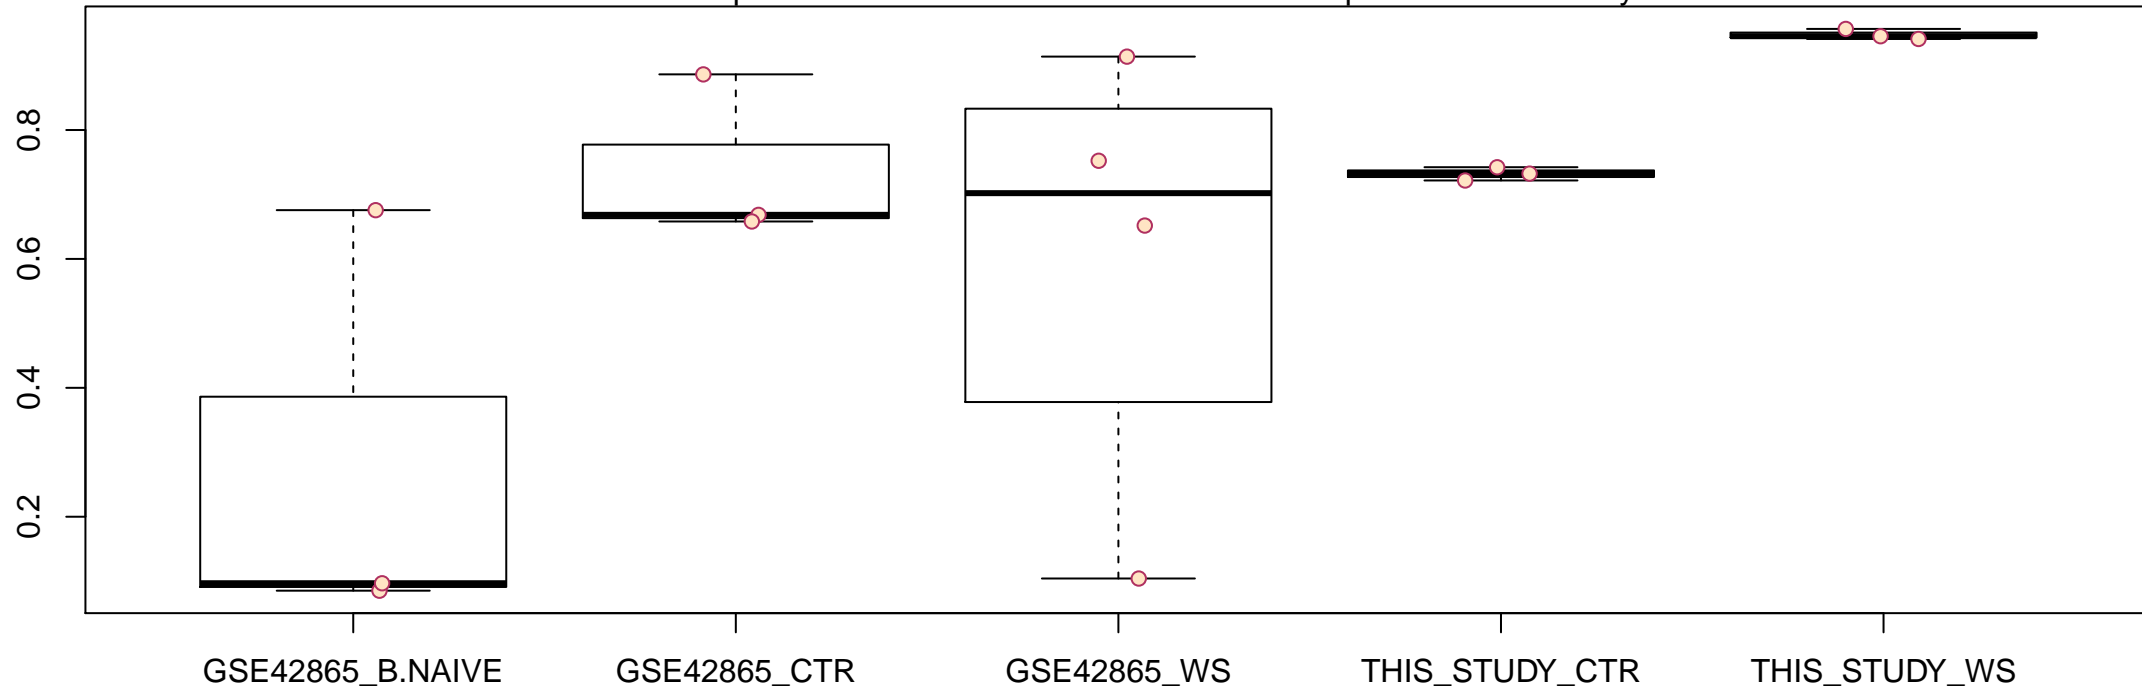

**cg04384638 GDF1;CERS1 chr19:19006031-19007546 S\_Shore**

WSvsCTR p-value in GSE42865:0.408 WSvsCTR p-value in this study:0.1635

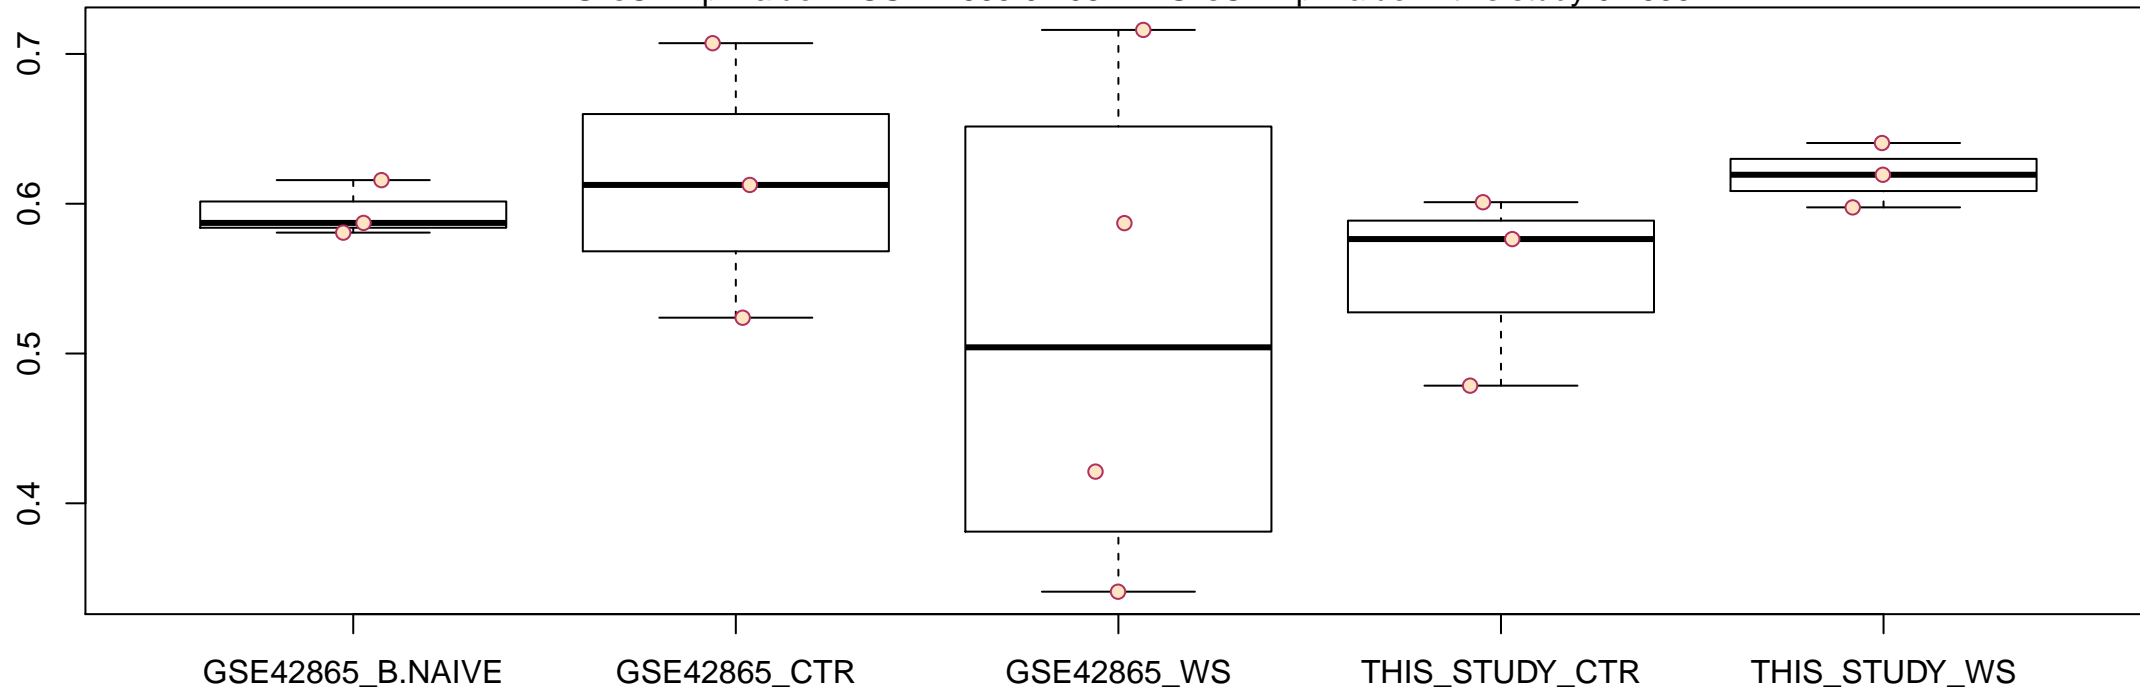

# cg14548901 ROCK2

WSvsCTR p-value in GSE42865:0.1986    WSvsCTR p-value in this study:9e-04

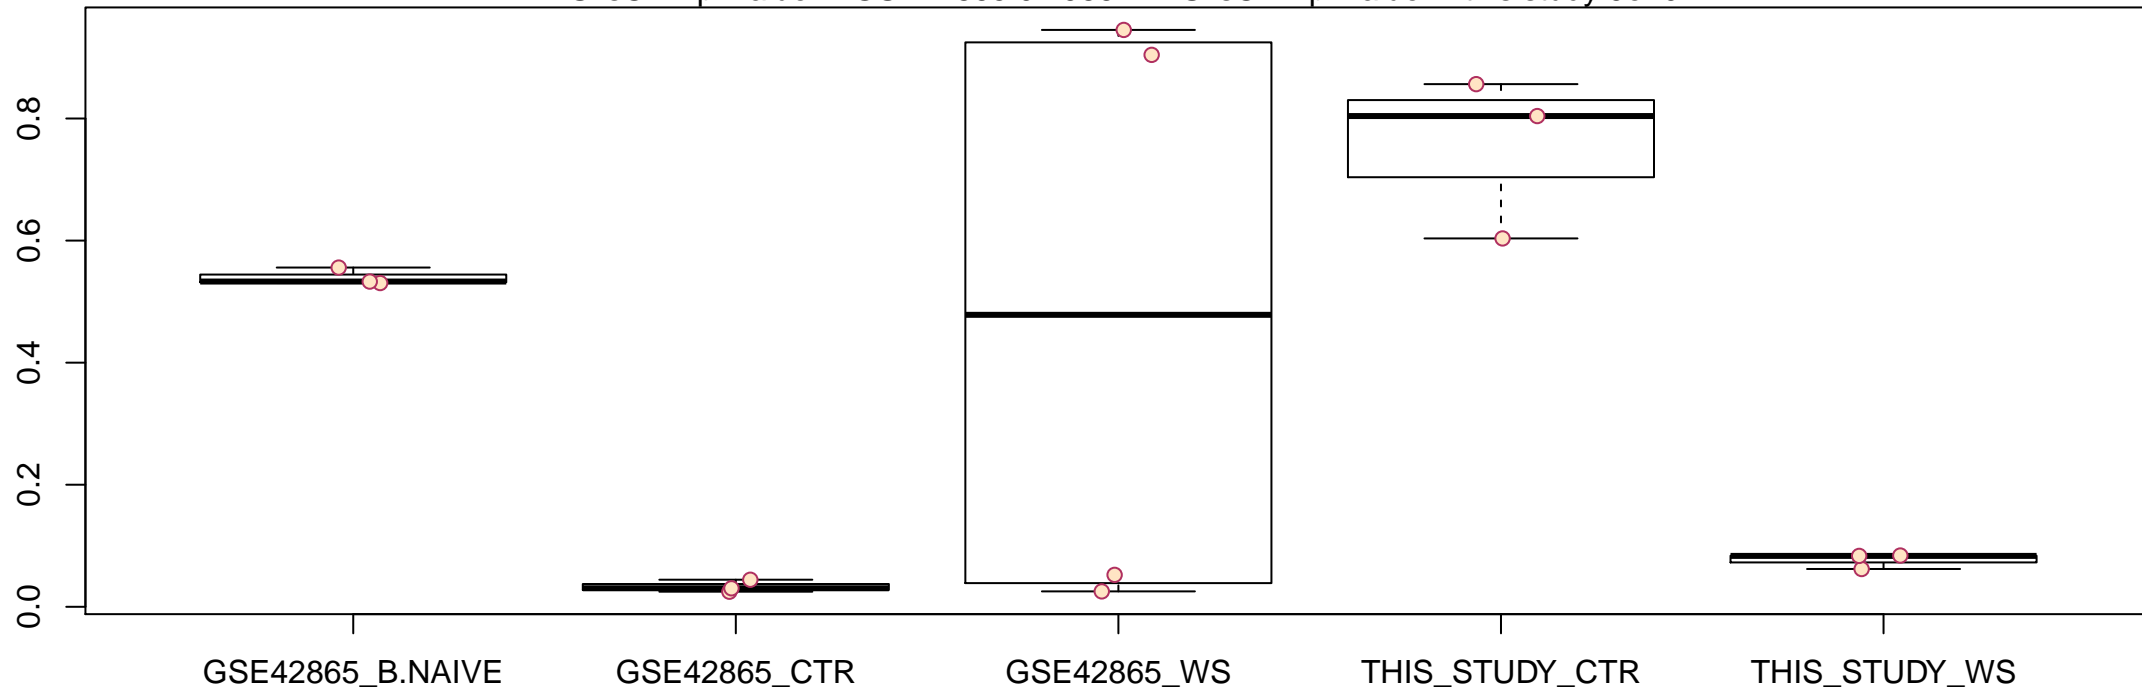

### cg02092276 COL6A6

WSvsCTR p-value in GSE42865:0.2526    WSvsCTR p-value in this study:1e-04

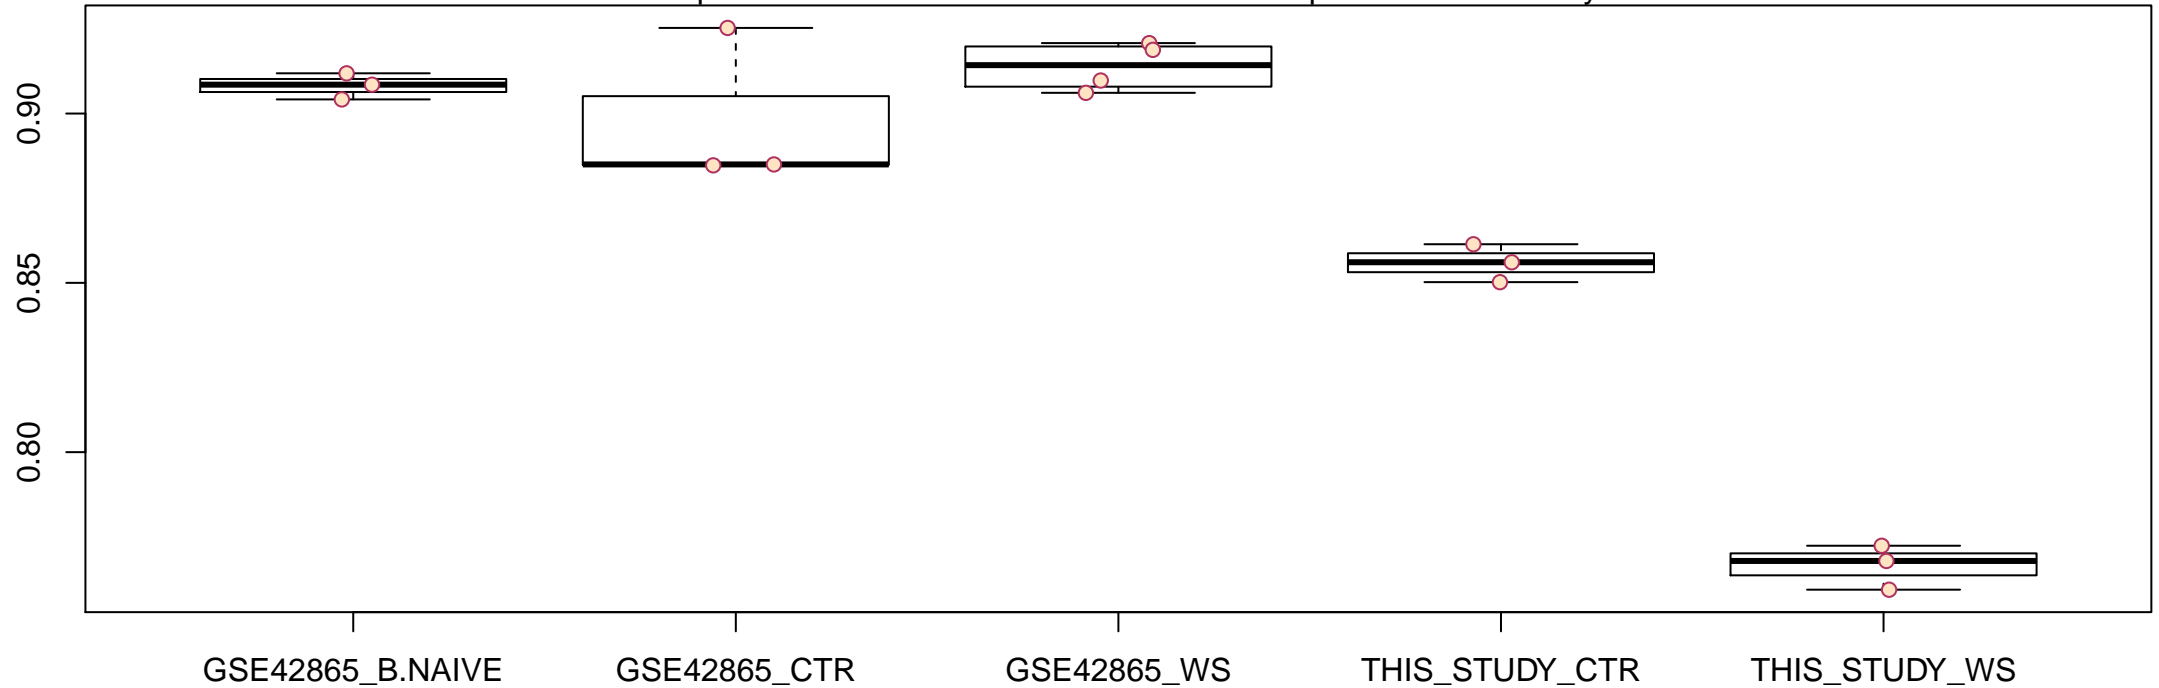

# cg05093818 MAPK10

WSvsCTR p-value in GSE42865:0.253    WSvsCTR p-value in this study:0

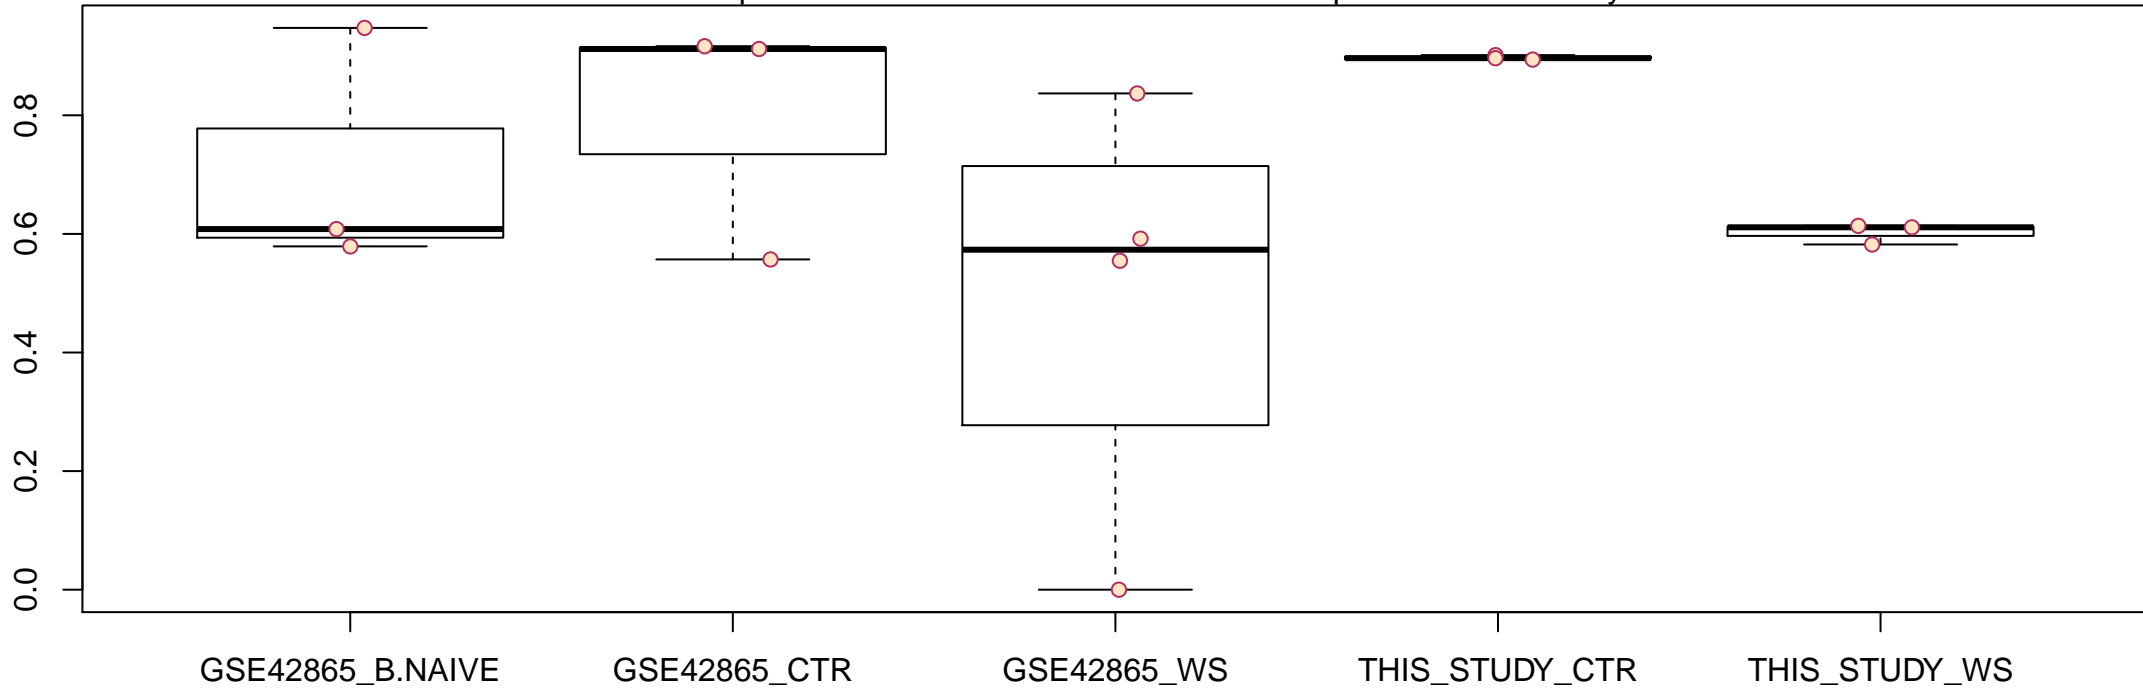



# cg01287079 FOXO3

WSvsCTR p-value in GSE42865:0.3761    WSvsCTR p-value in this study:5e-04

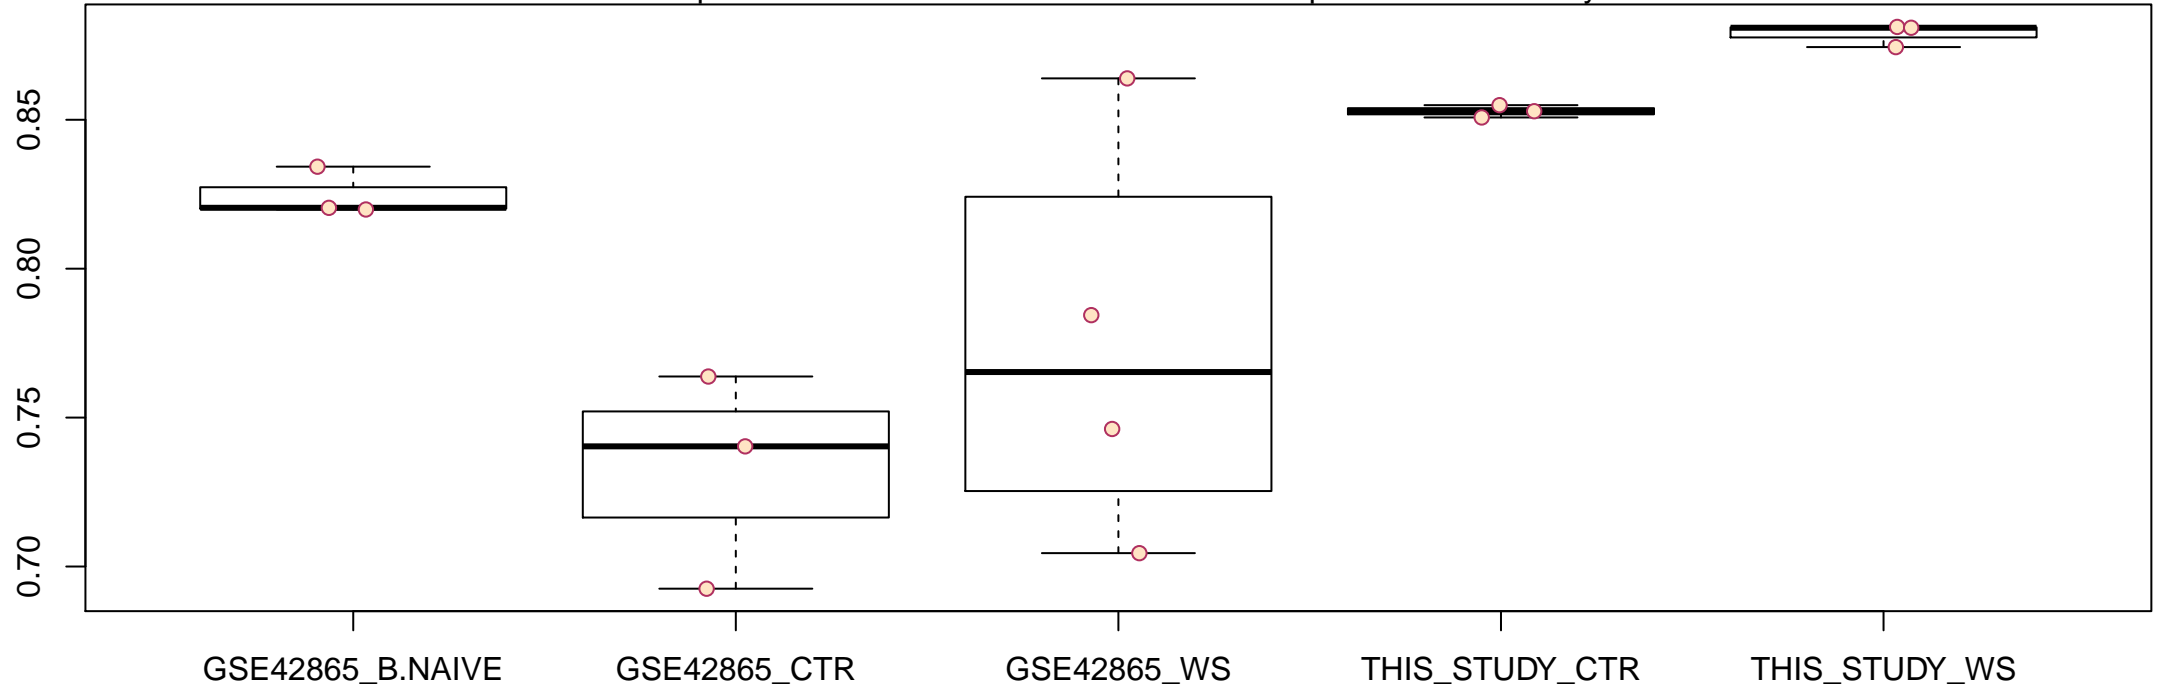



# cg24986615 PRKAR1B chr7:599089–599327 N\_Shore

WSvsCTR p-value in GSE42865:0.314    WSvsCTR p-value in this study:4e-04

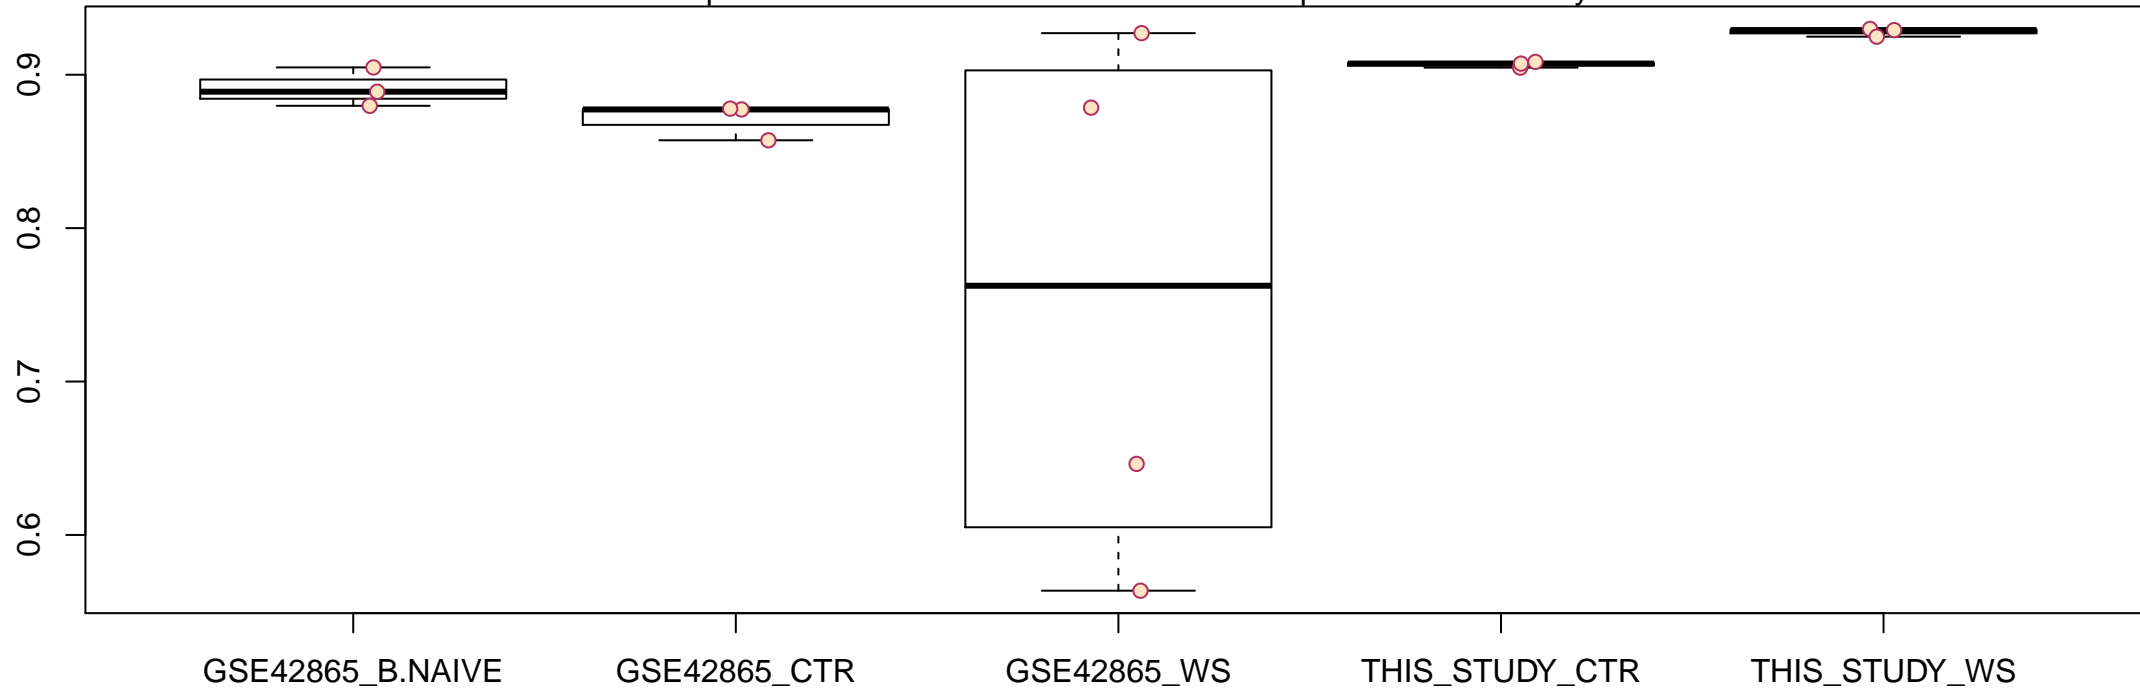

# cg03089725 FGFR1

WSvsCTR p-value in GSE42865:0.3015    WSvsCTR p-value in this study:7e-04

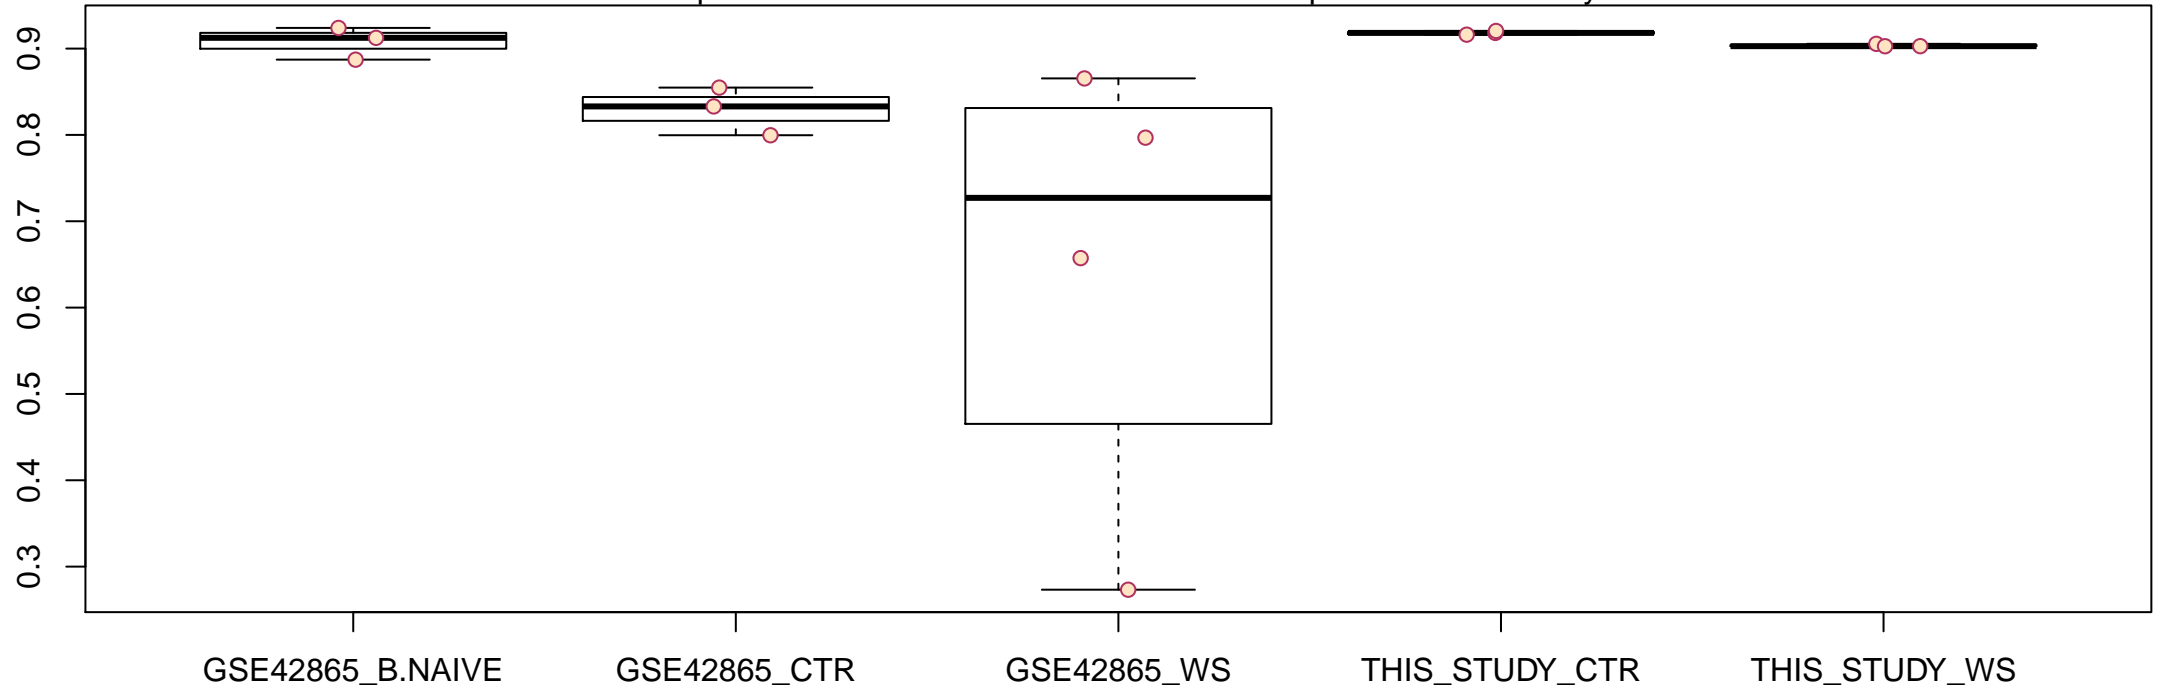

# cg00736681 ST3GAL1

WSvsCTR p-value in GSE42865:0.7684    WSvsCTR p-value in this study:1e-04

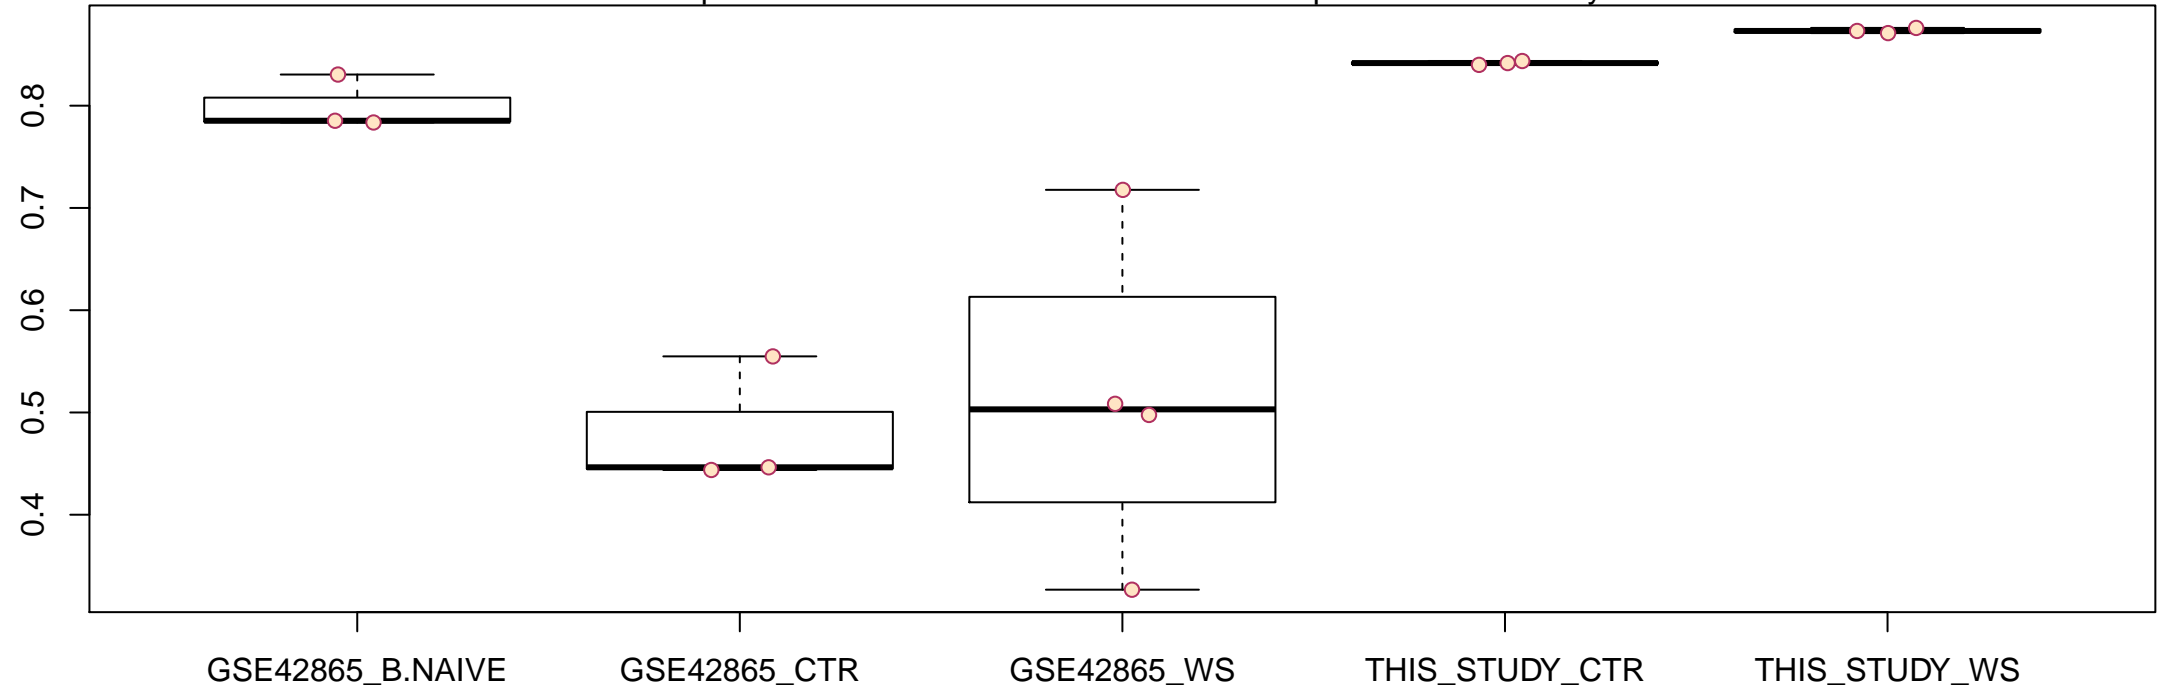

# cg14209823 GBGT1 chr9:136024223-136025112 S\_Shelf

WSvsCTR p-value in GSE42865:0.1869    WSvsCTR p-value in this study:5e-04

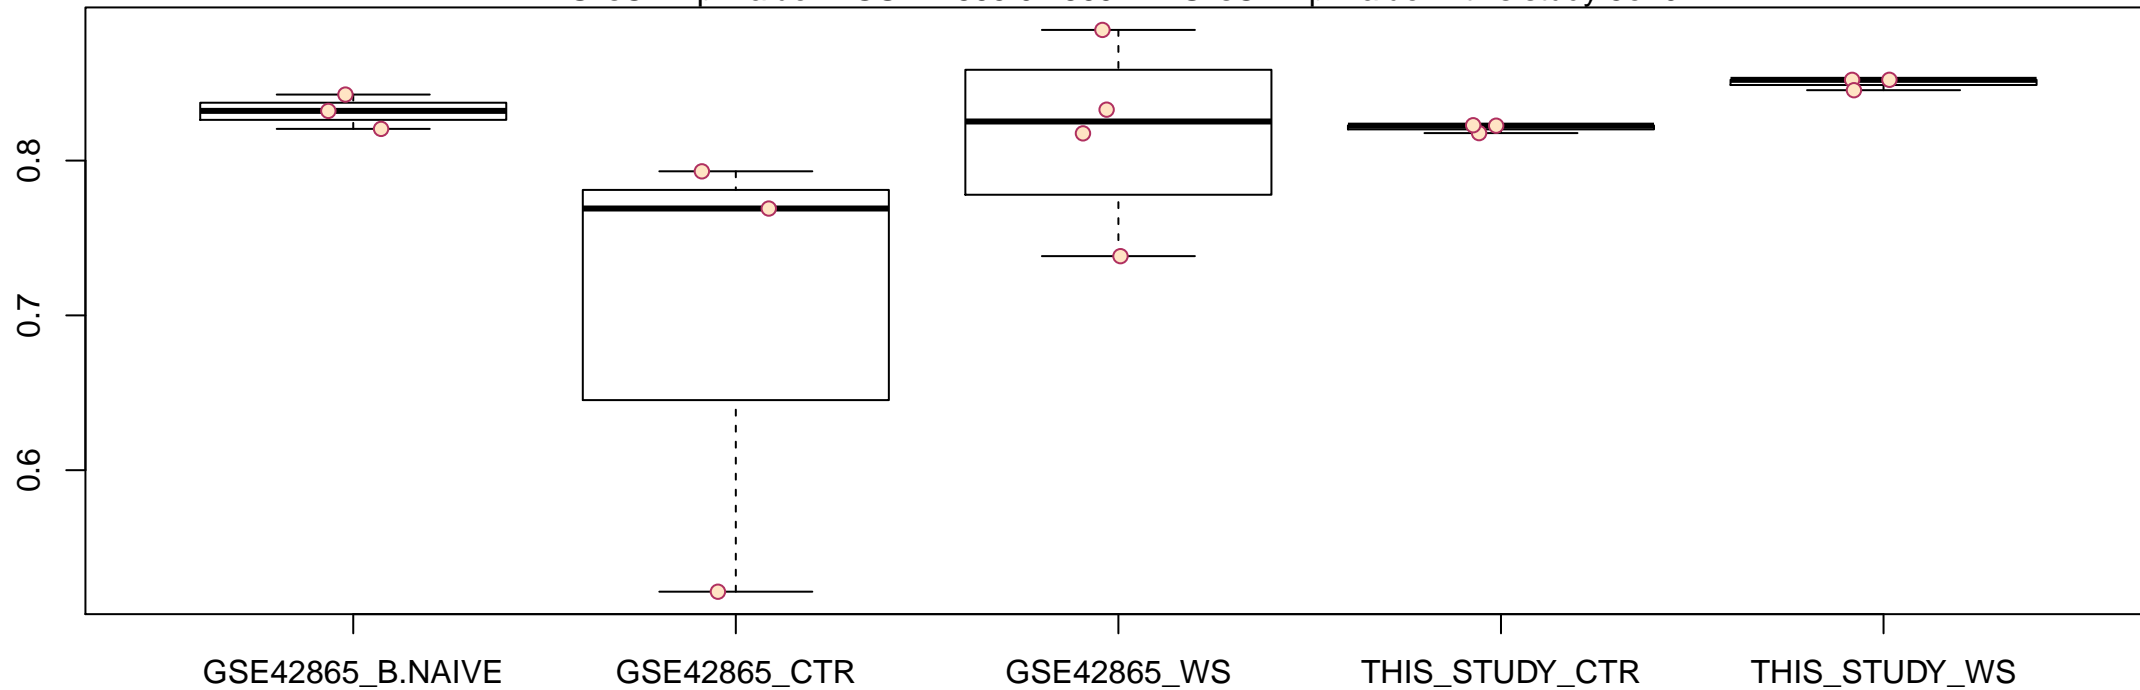

Supplement: 13148_2017_389_MOESM5_ESM.pdf [file 13148_2017_389_MOESM5_ESM.pdf]
